1 **Zebrafish screen of high-confidence effector genes at insomnia GWAS loci implicates**  
2 **conserved regulators of sleep-wake behaviors**

3  
4 Amber J. Zimmerman<sup>a,b</sup>, Fusun Doldur-Balli<sup>b</sup>, Brendan T. Keenan<sup>b</sup>, Zoe Y. Shetty<sup>b</sup>, Justin  
5 Palermo<sup>c</sup>, Alessandra Chesi<sup>a,d</sup>, Shilpa Sonti<sup>a</sup>, Matthew C. Pahl<sup>a</sup>, Elizabeth B. Brown<sup>c</sup>, James A.  
6 Pippin<sup>a</sup>, Andrew D. Wells<sup>a,d,e</sup>, Olivia J. Veatch<sup>f</sup>, Diego R. Mazzotti<sup>g,h</sup>, Anitra Krishnan<sup>b</sup>, Phillip R.  
7 Gehrman<sup>i</sup>, and Alex C. Keene<sup>c</sup>, Struan F.A. Grant<sup>a,j,k,l,#</sup>, Allan I. Pack<sup>b,#</sup>

8 #Denotes equal contribution

9  
10 <sup>a</sup>Center for Spatial and Functional Genomics, Children’s Hospital of Philadelphia, Philadelphia,  
11 PA, USA

12 <sup>b</sup>Division of Sleep Medicine, Department of Medicine, Perelman School of Medicine, University  
13 of Pennsylvania, PA, United States

14 <sup>c</sup>Department of Biology, Texas A&M University, College Station, TX, United States.

15 <sup>d</sup>Department of Pathology and Laboratory Medicine, University of Pennsylvania Perelman  
16 School of Medicine, Philadelphia, PA, USA.

17 <sup>e</sup>Department of Pathology, Children’s Hospital of Philadelphia, Philadelphia, PA, USA.

18 <sup>f</sup>Department of Psychiatry and Behavioral Sciences, University of Kansas Medical Center,  
19 Kansas City, KS, USA

20 <sup>g</sup>Division of Medical Informatics, Department of Internal Medicine, University of Kansas  
21 Medical Center, Kansas City, KS, USA

22 <sup>h</sup>Division of Pulmonary Critical Care and Sleep Medicine, Department of Internal Medicine,  
23 University of Kansas Medical Center, Kansas City, KS, USA

24 <sup>i</sup>Department of Psychiatry, Perelman School of Medicine, University of Pennsylvania, PA, USA

25 <sup>j</sup>Department of Pediatrics, The University of Pennsylvania Perelman School of Medicine,  
26 Philadelphia, PA, USA

27 <sup>k</sup>Division of Human Genetics, Children's Hospital of Philadelphia, Philadelphia, PA, USA

28 <sup>l</sup>Department of Genetics, University of Pennsylvania, Philadelphia, PA, USA

29

### 30 **Abstract**

31 Recent large-scale human genome-wide association studies (GWAS) for insomnia have  
32 identified more than 200 significant loci. The functional relevance of these loci to the  
33 pathogenesis of insomnia is largely unknown. GWAS signals are typically non-coding variants,  
34 which are often arbitrarily annotated to the nearest protein-coding gene; however, due to 3D  
35 chromatin structure, variants can interact with more distal genes driving their function. The distal  
36 gene may, therefore, represent the true causal gene influencing the phenotype. By integrating  
37 our high-resolution chromatin interaction maps from neural progenitor cells with phenotypic data  
38 from a *Drosophila* RNAi screen, we prioritized candidate genes that we hypothesized would  
39 have deep phylogenetic conservation of sleep function. To determine the conservation of these  
40 candidate genes in the context of vertebrate sleep and their relevance to insomnia-like  
41 behaviors, we performed CRISPR-Cas9 mutagenesis in larval zebrafish for six highly conserved  
42 candidate genes and examined sleep-wake behaviors using automated video-tracking. CRISPR  
43 mutation of zebrafish orthologs of *MEIS1* and *SKIV2L* produced insomnia-like behaviors, while  
44 mutation of *ARFGAP2* impaired activity and development in our larval zebrafish model,  
45 demonstrating the importance of performing functional validation of GWAS-implicated effector  
46 genes to reveal genes influencing disease-relevant mechanisms.

47

48

49

## 50 1. Introduction

51 Chronic sleep disruption is linked to a variety of negative health sequelae, including impaired  
52 metabolic and cognitive function. Nearly one-third of the adult population reports chronic sleep  
53 disturbance and symptoms of insomnia (Stranges *et al.*, 2012). Insomnia is characterized as a  
54 combination of difficulty initiating sleep (increased sleep latency), and/or difficulty maintaining  
55 sleep accompanied by daytime consequences (e.g. fatigue, irritability) despite ample  
56 opportunity for sleep (Association, 2013; Morin *et al.*, 2015). Insomnia, along with other sleep  
57 traits including sleep duration, napping, and daytime dozing, are heritable and extremely  
58 polygenic (Dashti *et al.*, 2019; Lane *et al.*, 2017). Large-scale genome-wide association studies  
59 (GWAS) have revealed several hundred genomic loci for insomnia and other sleep traits (Dashti  
60 *et al.*, 2019; Hammerschlag *et al.*, 2017; Jansen *et al.*, 2019; Lane *et al.*, 2017; Watanabe *et al.*,  
61 2022). Publicly available datasets for chromatin accessibility and gene expression have aided  
62 gene mapping at these GWAS loci; however, the majority of loci are still typically positionally  
63 mapped to the nearest gene or mapped using *in silico* prediction on aggregate data (Watanabe  
64 *et al.*, 2022). These approaches can misidentify the true causal effector gene(s) at a GWAS  
65 locus (Claussnitzer *et al.*, 2020; Forgetta *et al.*, 2022; Fulco *et al.*, 2019; Lappalainen and  
66 MacArthur, 2021; Smemo *et al.*, 2014; Tam *et al.*, 2019), which in turn can lead to  
67 mischaracterization of mechanisms underlying insomnia and limit the utility of human genomics  
68 data for informing clinical care. Detailed fine-mapping of genome-wide significant loci should  
69 ideally be carried out in a specific cell-type setting yielding disease-relevant information to  
70 prioritize candidate effector genes (Chesi *et al.*, 2019; Lasconi *et al.*, 2021; Lasconi *et al.*, 2022;  
71 Pahl *et al.*, 2021; Su *et al.*, 2020), and should be subsequently validated through functional  
72 phenotyping in model organisms to identify those with the greatest impact on disease  
73 pathogenesis.

74

75 Given the high conservation of sleep-wake behaviors, across species, model organisms can be  
76 leveraged to study these behaviors by assessing changes to sleep characteristics, which  
77 provide insight into the development of insomnia-like behaviors. High-throughput phenotyping in  
78 model organisms can greatly speed up gene prioritization for drug discovery and therapeutic  
79 development (Freeman *et al.*, 2013; Hendricks *et al.*, 2000; Tran and Prober, 2022). Zebrafish  
80 are an established vertebrate model organism to deploy efficient CRISPR/Cas9 mutagenesis  
81 paired with large-scale sleep phenotyping given both their genetic tractability and rapid  
82 developmental timeline (Tran and Prober, 2022). Unlike some model organisms, including mice,  
83 zebrafish sleep is diurnally regulated and primarily consolidated to the night similar to humans.  
84 Additionally, zebrafish sleep is circadian-regulated, reversable, and has a heightened arousal  
85 threshold, making them an appropriate model for assaying behavior relevant to sleep  
86 dysfunction (Barlow and Rihel, 2017; Chiu and Prober, 2013; Rihel *et al.*, 2010; Tran and  
87 Prober, 2022). Moreover, genetic conservation between zebrafish and human is relatively high  
88 (Howe *et al.*, 2013), as they are both vertebrates, and indeed many of the genes identified to  
89 date that regulate sleep are highly conserved (Jansen *et al.*, 2019).

90

91 To precisely identify causal effector genes associated with human insomnia GWAS loci, we  
92 have developed a high-resolution method for 3D genomic mapping of GWAS variants using a  
93 disease-relevant cell type (Palermo *et al.*, 2021; Su *et al.*, 2021). This approach integrates RNA-  
94 seq, assay for transposase-accessible chromatin using sequencing (ATAC-seq) data, and high-  
95 resolution promoter-focused Capture C in order to identify physical contacts between putatively  
96 causal variants and open promoters at candidate effector genes (Chesi *et al.*, 2019; Pahl *et al.*,  
97 2021; Su *et al.*, 2020) in neural progenitor cells (NPCs) (Palermo *et al.*, 2021). The identified  
98 effector genes serve as strong candidates for functional studies in model organisms.

99

100 A high-throughput screen using RNA interference (RNAi) in *Drosophila* was then used to identify  
101 effector genes that produced a significant alteration in sleep duration (Palermo *et al.*, 2021).  
102 These studies in *Drosophila* produced a refined candidate gene list identifying highly conserved  
103 regulators of sleep function that are relevant to human insomnia, including *SKIV2L*, *GNB3*,  
104 *CBX1*, *MEIS1*, *TCF12* and *ARFGAP2*. Of these genes, only *MEIS1* has been functionally  
105 connected to a behavioral phenotype reminiscent of insomnia (Hammerschlag *et al.*, 2017; Lane  
106 *et al.*, 2017; Thireau *et al.*, 2017).

107  
108 The current study applied CRISPR-Cas9 mutagenesis in a vertebrate model (zebrafish) (Kroll *et*  
109 *al.*, 2021) to determine if the function of these implicated genes is conserved in vertebrates and  
110 relevant to sleep dysfunction observed in human insomnia. Since assessment of sleep in  
111 zebrafish is dependent on assessment of movement, we first determined if there was any  
112 evidence of movement abnormalities before examining sleep and then proceeded to examine  
113 sleep characteristics in CRISPR mutants.

114

## 115 **2. Results**

### 116 **2.1 Identification of high-confidence insomnia effector genes**

117 To examine the role and evolutionary conservation of genes regulating sleep, we integrated 3D  
118 genomics data (Palermo *et al.*, 2021; Su *et al.*, 2021) with phenotypic data from a high-  
119 throughput *Drosophila* RNAi screen (Palermo *et al.*, 2021). Effector genes were defined as those  
120 with promoters residing in open chromatin regions, which also display high resolution chromatin  
121 contacts with putative insomnia causal variants associated with significant GWAS loci (**Fig. 1A**)  
122 in neural progenitor cells (NPCs) (Palermo *et al.*, 2021). These genes are highly expressed in  
123 NPCs and demonstrate high conservation across human, zebrafish, and *Drosophila* (Hu *et al.*,

124 2011) (**Supplementary Table 1**), making them high-priority candidates for functional  
125 assessment.

126  
127 Our previous work performed high-throughput screening of candidate effector genes using  
128 *Drosophila* RNAi, revealing a subset of genes producing exceptionally strong sleep phenotypes  
129 (Palermo *et al.*, 2021) (**Fig. 1A, right panel**), of which we chose to perform functional follow-up  
130 using zebrafish to identify conservation of function within a vertebrate model organism. The  
131 human orthologs of these genes were *SKIV2L*, *GNB3*, *CBX1*, *MEIS1*, *TCF12*, and *ARFGAP2*,  
132 which are involved in a variety of conserved cellular processes in humans involving  
133 transcriptional regulation, cellular trafficking, and signal transduction.

134  
135 To determine whether these candidate effector genes exhibit strong evolutionary conservation  
136 of function related to sleep, we employed CRISPR-Cas9 mutagenesis in single-cell embryos  
137 followed by rapid behavioral screening of F0 larval zebrafish (Kroll *et al.*, 2021) 5 to 7 days post  
138 fertilization (**Fig. 1B**).

139  
140 **2.2 Screening for gross movement phenotypes reveals *ARFGAP2* ortholog as a**  
141 *neurodevelopmental gene*

142 Given that our quantification of sleep in zebrafish is dependent on activity patterns, we first  
143 sought to examine gross motor behaviors and activity patterns to eliminate potential confounds  
144 that could contribute to the measured sleep behaviors. To do this, we measured waking activity,  
145 which is calculated as the duration of movement only during “awake” minutes (awake threshold  
146 >0.5 s/min) and serves as a proxy for general movement disruptions that may indicate gross  
147 motor changes following genetic manipulation. Since many sleep-wake behaviors are not  
148 normally distributed, we used a Wilcoxon rank sum test to test for significance between each  
149 CRISPR mutant and its own control correcting for multiple comparisons across all eleven

150 measured sleep traits using a Hochberg step-up procedure (Hochberg, 1988; Huang and Hsu,  
151 2007) (see **Methods**), which performs well when outcomes are correlated, as sleep traits  
152 generally are. While, *skiv2l*, *gnb3a*, *cbx1b*, *meis1b*, and *tcf12* mutants showed no significant ( $P$   
153  $> 0.05$  following multiple comparisons) changes to daytime or nighttime waking activity (**Fig. 2A-**  
154 **E, G-K**), *Gnb3a* (**Fig. 2B**), *cbx1b* (**Fig. 2C**), and *tcf12* (**Fig. 2E**) mutants showed mildly  
155 increased nighttime waking activity that did not reach the threshold for significance following  
156 multiple comparisons, which may represent a subtle hyperactive phenotype during the night.  
157 Although we observed no difference in nighttime waking activity of *arfgap2* mutants (mean  
158 difference = -0.03 s/awake minute (-0.12, 0.06,  $P = 0.20$ , standardized mean difference (smd) =  
159 -0.18)), we found a large reduction in daytime waking activity in *arfgap2* mutants (**Fig. 2L-M**)  
160 (mean difference (95% CI) -0.90 s/awake minute (-1.21, -0.59),  $P < 0.0001$ , smd = -1.34)  
161 indicative of an impaired movement phenotype.

162

163 Genes influencing insomnia are also commonly involved in neuronal development and can  
164 differentially influence behavior across developmental stages. Larval zebrafish develop an intact  
165 nervous system within the first few days of development and gene mutations that disrupt  
166 neurodevelopment lead to apparent changes in body morphology (Tran and Prober, 2022). We  
167 observed no gross morphological changes to *skiv2l*, *gnb3a*, *cbx1b*, *meis1b*, or *tcf12* mutants  
168 (data not shown); however, a clear and consistent morphological abnormality in *arfgap2*  
169 mutants was apparent beginning on approximately day 3 post fertilization, whereby nearly all  
170 mutants presented with a curvature in the tail (**Fig. 2N**). This morphological change paired with  
171 the markedly reduced waking activity suggests *arfgap2* is important during early development  
172 for proper motor development. Given this, we cannot reliably assess sleep/wake behavior in  
173 mutants with knockout of this gene.

174

175 **2.2 Diurnal activity patterns are impacted by insomnia-associated genes.**

176 We next sought to describe the diurnal activity patterns in each of the mutants to determine  
177 whether insomnia-associated genes influence patterns of rest and activity. Insomnia complaints  
178 are often described as states of hypervigilance (Chen *et al.*, 2014) and hyperarousal  
179 (Fernandez-Mendoza *et al.*, 2016; Kalmbach *et al.*, 2018). To capture similar states relating to  
180 hyperactivity in zebrafish, we measured activity patterns across light and dark periods. As  
181 expected, activity patterns showed robust entrainment by light-dark cycles in those mutants  
182 (**Fig. 3A-C**). Our previous work using neuron-specific RNAi resulted in significantly reduced  
183 activity duration in *Drosophila* (Palermo *et al.*, 2021). In zebrafish, however, we observed  
184 significantly increased daytime activity duration in *skiv2l* mutants (mean difference (95% CI) =  
185 20.56 s/h (5.61, 35.51),  $P = 0.005$ ,  $smd = 0.43$ ) (**Fig. 3D**) with no change in night activity mean  
186 difference (95% CI) = 1.97 s/h (-1.53, 5.46),  $P = 0.28$ ,  $smd = 0.18$ ) (**Fig. 3E**). *MEIS1* has  
187 commonly been associated with insomnia (Jansen *et al.*, 2019; Watanabe *et al.*, 2022) and  
188 restless leg syndrome (Lam *et al.*, 2022; Salminen *et al.*, 2017; Schulte *et al.*, 2014; Spieler *et*  
189 *al.*, 2014), and knockdown in *Drosophila* resulted in reduced sleep with no change to  
190 activity (Palermo *et al.*, 2021). Likewise, in zebrafish, we observed no significant change to  
191 daytime activity (mean difference (95% CI) = 10.93 s/h (-1.62, 23.48),  $P = 0.2$ ,  $smd = 0.23$ )  
192 (**Fig. 3F**) or nighttime activity (mean difference (95% CI) = 1.37 s/h (-2.21, 4.94),  $P = 0.25$ ,  $smd$   
193 = 0.10) (**Fig. 3G**). While knockdown of the *Drosophila* ortholog of *GNB3* displayed markedly  
194 reduced activity (Palermo *et al.*, 2021), CRISPR mutation of the zebrafish ortholog did not  
195 present with altered activity (**Supplementary Fig. 1A and B**), nor did *cbx1b* or *tcf12* mutants  
196 (**Supplementary Fig. 1C-F**).

197

198 Given the robust reduction in daytime waking activity observed in *arfgap2* mutants, we  
199 anticipated a reduction in total activity measured. Indeed, *arfgap2* mutants displayed  
200 significantly reduced daytime activity (mean difference (95% CI) = -64.92 (-83.98, -45.87),  $P <$



201 0.0001,  $smd = -1.60$ ) (**Fig. 3H**) and nighttime activity (mean difference (95% CI) = -5.62 (-9.81, -  
202 1.43),  $P = 0.004$ ,  $smd = -0.62$ ) (**Fig. 3I**), demonstrating mutation of *arfgap2* greatly impairs  
203 movement in zebrafish.

204

### 205 **2.3 Total sleep duration and latency to sleep onset is perturbed in CRISPR mutants**

206 After screening for developmental and activity phenotypes, we characterized sleep in the six  
207 zebrafish mutants to determine if these insomnia-associated genes influenced sleep duration in  
208 vertebrates (zebrafish) in a similar manner to invertebrates (*Drosophila*). We measured sleep  
209 across the fourteen-hour day and the ten-hour night using a standardized criterion of inactivity  
210 bouts lasting one minute or longer, as this has reliably been associated with the characteristics  
211 observed in mammalian sleep (e.g. elevated arousal threshold) (Chiu and Prober, 2013; Prober  
212 *et al.*, 2006; Singh *et al.*, 2015; Tran and Prober, 2022; Zhdanova *et al.*, 2001). Diurnal sleep-  
213 wake patterns were intact in mutant and control fish (**Fig. 4A-B and Supplementary Fig. 3A**).  
214 *Drosophila* knockdown of the *SKIV2L* ortholog resulted in a robust increase in sleep duration  
215 (Palermo *et al.*, 2021), but loss of *skiv2l* in zebrafish significantly reduced daytime sleep  
216 duration (mean difference (95% CI) = -5.11 minutes/hour (-7.77, -2.45),  $P = 0.0001$ ,  $smd = -$   
217 0.61) (**Fig. 4C**), with a modest reduction in nighttime sleep duration (mean difference (95% CI) =  
218 -2.65 minutes/hour (-5.68, 0.37),  $P = 0.07$ ,  $smd = -0.28$ ) (**Fig. 4D**).

219

220 Since waking activity and development were impacted by mutation of *arfgap2*, we cannot  
221 reliably assess sleep in these fish. Because our measurement of sleep is defined as bouts of  
222 inactivity greater than one minute, calculations of sleep appear to demonstrate an increase in  
223 both daytime (mean difference (95% CI) = 26.09 minutes/hour (20.52, 31.66),  $P < 0.0001$ ,  $smd$   
224 = 2.16) (**Supplementary Fig. 3B**) and nighttime sleep duration (mean difference (95% CI) =  
225 8.37 minutes/hour (4.65, 12.09),  $P < 0.0001$ ,  $smd = 1.06$ ) (**Supplementary Fig. 3C**); however,  
226 this is likely an artifact caused by significantly reduced movement. These data demonstrate the

227 importance of screening for developmental and activity phenotypes when relying on activity as a  
228 metric for sleep.

229

230 Despite finding a significant reduction in total sleep duration measured in *Drosophila* following  
231 knockdown of the *MEIS1* ortholog (Palermo et al., 2021), loss of *meis1b* in zebrafish did not  
232 significantly ( $P > 0.05$ ) alter total sleep duration (**Fig. 4E-F**). No significant changes in total sleep  
233 duration were observed in *gnb3a*, *tcf12*, and *cbx1b* mutants (**Supplementary Fig. 1G-L**).

234

235 Another key feature of insomnia is difficulty initiating sleep with an increase in latency to sleep  
236 onset. Since zebrafish sleep is tightly regulated by light-dark transition, a measure of sleep  
237 latency at night can be used to indicate time to sleep onset following lights-off. Mutations in  
238 *skiv2l* produced an increase in sleep latency (mean difference (95% CI) = 1.43 minutes (0.33,  
239 2.52),  $P = 0.02$ ,  $smd = 0.41$ ) (**Fig. 4G**); however, this difference did not strictly meet the  
240 threshold for significance following multiple comparisons (see **Methods**). *Meis1b* mutants  
241 showed an increased sleep latency (mean difference (95%) = 1.13 minutes (0.44, 1.82),  $P =$   
242 0.0004,  $smd = 0.45$ ) (**Fig. 4H**), supporting the role of this gene in insomnia-like behavior.  
243 Despite having reduced nighttime activity, *arfgap2* mutants did not have a significantly different  
244 sleep latency relative to controls (mean difference = -1.40 minutes (-2.56, -0.24),  $P = 0.08$ ,  $smd$   
245 = -0.54) (**Supplementary Fig. 3D**). Sleep latency was not altered in *gnb3a*, *tcf12*, or *cbx1b*  
246 mutants (**Supplementary Fig. 2A-C**).

247

#### 248 **2.4 Insomnia-associated genes contribute to changes in sleep continuity**

249 Total sleep duration is not always impacted in patients with insomnia; rather, sleep is  
250 fragmented or considered not restorative leading to excessive daytime sleepiness (Association,  
251 2013). We measured sleep bout length (the average length of each sleep period) during night  
252 and day as well as arousal threshold to observe changes to sleep depth across mutant lines.

253 Furthermore, we measured sleep bout number (total number of sleep episodes) during day and  
254 night as a representation of sleep fragmentation. Consistent with reduced daytime sleep in  
255 *skiv2l* mutants, these larvae also demonstrated a reduction in sleep bout number during the day  
256 (mean difference (95% CI) = -1.75 bouts/hour (-2.61, -0.89),  $P = 0.0001$ ,  $smd = -0.65$ ) (**Fig. 5A**),  
257 with no change in bout number at night (mean difference (95% CI) = 0.26 bouts/hour (-0.39,  
258 0.91),  $P = 0.52$ ,  $smd = 0.13$ ) (**Fig. 5B**). Although *meis1b* mutants did not present with a  
259 generalized sleep duration abnormality, they did demonstrate a significant increase in the  
260 number of sleep bouts at night (mean difference (95% CI) = 1.34 (0.80, 1.87) bouts/hour,  $P <$   
261  $0.001$ ,  $smd = 0.67$ ) (**Fig. 5D**), with no change during the day (mean difference (95% CI) = 0.08  
262 bouts/hour (-0.73, 0.90),  $P = 0.27$ ,  $smd = 0.027$ ) (**Fig. 5C**), indicating nighttime-specific sleep  
263 fragmentation caused by a gene that is commonly associated with RLS (El Gewely *et al.*, 2018;  
264 Schulte *et al.*, 2014).

265  
266 There was no significant change in sleep bout length observed for *skiv2l* mutants during the day  
267 (mean difference (95% CI) = -0.22 minutes/bout (-0.58, 0.14),  $P = 0.51$ ,  $smd = -0.20$ ) or night  
268 (mean difference (95% CI) = -1.22 minutes/bout (-2.39, -0.05),  $P = 0.20$ ,  $smd = -0.33$ ) (**Fig. 5E**  
269 **and F**). Consistent with a fragmented sleep phenotype, nighttime sleep bout length was  
270 significantly shortened in *meis1b* mutants (mean difference (95% CI) = -1.49 minutes/bout (-  
271 2.52, -0.46),  $P = 0.002$ ,  $smd = -0.4$ ) (**Fig. 5H**), with no changes observed during the day (mean  
272 difference (95% CI) = -0.12 minutes/bout (-0.33, 0.10),  $P = 0.21$ ,  $smd = -0.15$ ) (**Fig. 5G**),  
273 demonstrating depth of sleep at night is also impacted by this gene.

274  
275 We measured sleep bout number and bout length in *arfgap2* mutants to identify fragmented  
276 activity patterns throughout the day and night. Bouts of prolonged inactivity were apparent in  
277 *arfgap2* mutants manifesting as an increase in the number of daytime “sleep” bouts (mean  
278 difference (95% CI) = 4.11 bout/hour (2.39, 5.83),  $P < 0.0001$ ,  $smd = 1.12$ ) (**Supplementary**

279 **Fig. 3E**). No change was observed for nighttime sleep bout number in *arfgap2* mutants  
280 (**Supplementary Fig. 3F**). Both day (mean difference = 2.85 minutes/bout (1.46, 4.23),  $P <$   
281 0.0001,  $smd = 1.04$ ) (**Supplementary Fig. 3G**) and night inactivity bouts were longer (mean  
282 difference (95% CI) = 3.68 minutes/bout (1.25, 6.11),  $P = 0.002$ ,  $smd = 0.75$ ) (**Supplementary**  
283 **Fig. 3H**). These data imply that while *arfgap2* mutants spend the majority of their day in an  
284 immobile state, they do frequently switch between states of complete immobility and activity, as  
285 marked by an increase in the number of daytime “sleep” bouts.

286  
287 Despite having no changes to total sleep or activity duration, *tcf12* mutants had fewer sleep  
288 bouts during the night (mean difference (95% CI) = -0.98 bouts/h (-1.74, -0.22),  $P = 0.005$ ,  $smd$   
289 = -0.47) (**Supplementary Fig. 4F**) and shorter sleep bouts during the night (mean difference  
290 (95.% CI) = -1.14 minutes/bout (-2.39, 0.10,  $P = 0.03$ ,  $smd = -0.34$ ) (**Supplementary Fig. 4L**);  
291 however, these differences did not meet the strict threshold for significance following multiple  
292 comparisons (see **Methods**). No significant changes were observed for these sleep  
293 characteristics in the *gnb3a* or *cbx1b* mutants (**Supplementary Fig. 5A-D and G-J**). Together,  
294 these data support a conserved role for *meis1b* and *skiv2l* in promoting sleep-wake disruption  
295 primarily through altering sleep duration and consolidation. Although, the measured sleep  
296 characteristics in *tcf12* mutants did not meet the conservative threshold for significance  
297 following multiple comparisons, loss of *tcf12* does appear to impact nighttime sleep continuity.

298  
299 Arousal threshold is increased during sleep in zebrafish (Prober *et al.*, 2006; Zhdanova *et al.*,  
300 2001) similar to humans, and increased nighttime arousal is a common feature of insomnia  
301 (Bonnet and Arand, 2000; Mahowald and Schenck, 2005). Using mechano-acoustic stimuli of  
302 different intensities (**Supplementary Fig. 5B**), we measured the arousal response of each  
303 mutant line during the night. We measured EC50 for each mutant line and their respective  
304 control. EC50 compares the half-maximal response and corresponds to the stimulus intensity

305 which elicits a response half-way between the minimum and maximum response and represents  
306 a threshold at which approximately half of the fish are aroused. While there is a slight shift to the  
307 right in the response curves at lower frequencies for *skiv2l* (**Supplementary Fig. 5C**), *meis1b*  
308 (**Supplementary Fig. 5D**), and *arfgap2* mutants (**Supplementary Fig. 5E**), suggesting reduced  
309 arousal response at low stimuli intensities, the EC50 and maximal responses did not  
310 significantly differ for any group ( $P > 0.05$  by extra sum-of-squares F-test). There was an  
311 expected step-wise increase in the fraction of responsive larvae as stimulus intensity increased  
312 (**Supplementary Fig. 5C-E**) indicating the majority of fish were asleep pre-stimulus and had an  
313 intact arousal response.

314

### 315 **3. Discussion**

316 There is an abundance of genomic data available through public repositories generated from  
317 GWAS and other sequencing approaches; however, functional characterization lags in  
318 validating the actual underlying genomic factors contributing to different phenotypes. Here, we  
319 demonstrate a proof-of-principle approach for moving from GWAS-implicated effector genes to  
320 validation in a vertebrate model organism for insomnia.

321

322 We elected to perform functional validation of top candidate genes identified using 3D genomics  
323 and *Drosophila* sleep data (Palermo *et al.*, 2021). The candidate genes screened in this study  
324 have been mapped to insomnia GWAS-associated loci using ATAC-seq and promoter-focused  
325 Capture C protocols to identify high-resolution contacts between insomnia GWAS signals and  
326 effector genes (Palermo *et al.*, 2021). Through a large-scale neuron-specific RNAi screen in  
327 adult *Drosophila melanogaster*, loss of function of these genes was shown to produce robust  
328 sleep phenotypes (Palermo *et al.*, 2021), demonstrating their high conservation and potential  
329 regulatory function in sleep. The studies reported here tested the evolutionary conservation of

330 function related to six genes which are highly conserved at the amino acid level across species  
331 and produced strong sleep phenotypes in *Drosophila* (*MEIS1*, *CBX1*, *TCF12*, *ARFGAP2*,  
332 *SKIV2L*, and *GNB3*).

333

334 Increasingly, studies have shown that in addition to total sleep duration, altered sleep  
335 characteristics and poor sleep quality are predictive of negative health sequelae (Fernandez-  
336 Mendoza, 2017; Martin *et al.*, 2011; Wallace *et al.*, 2018). This includes day-to-day variability in  
337 sleep duration, sleep onset and waking time, as well as sleep fragmentation and excessive  
338 daytime sleepiness. Zebrafish provide a model system to observe these nuanced behaviors  
339 absent of external influences. Our results indicated disruptions to sleep continuity in multiple  
340 mutant lines as well as altered daytime sleep and activity, suggesting these genes play a role in  
341 more complex sleep-wake maintenance.

342

343 We observed that CRISPR mutation of *meis1b*, the strongest ortholog for human *MEIS1*, results  
344 in significantly fragmented nighttime sleep as well as increased sleep latency after lights-off.  
345 *MEIS1* is highly conserved, with 95% amino acid identity between zebrafish and humans (Hu *et*  
346 *al.*, 2011). This gene encodes the Myeloid Ecotropic Viral Integration Site 1 protein, which acts  
347 as a transcription factor (Moskow *et al.*, 1995). The *MEIS1* locus is one of the strongest  
348 association signals from previous insomnia GWAS (Jansen *et al.*, 2019; Lane *et al.*, 2017;  
349 Watanabe *et al.*, 2022). Our variant 3D-mapping approach identified a putative causal variant in  
350 strong linkage disequilibrium (LD) with the sentinel GWAS SNP at this locus, rs1519102, which  
351 contacted the *MEIS1* promoter residing in open chromatin within NPCs (Palermo *et al.*, 2021).  
352 rs1519102 resides within an intronic region, which suggests it is harbored in a cis-regulatory  
353 element acting as a transcriptional enhancer in a cell-specific manner (Lam *et al.*, 2022). Work  
354 by Lam and colleagues (Lam *et al.*, 2022) further identified expression quantitative trait loci  
355 (eQTL) residing within this region specific to brain cell types, including within the cerebellum,

356 one of the brain regions where *MEIS1* is highly expressed. While *MEIS1* has repeatedly been  
357 identified as a candidate gene for insomnia (Hammerschlag *et al.*, 2017; Jansen *et al.*, 2019;  
358 Lane *et al.*, 2017), there is debate as to whether its role in sleep disturbance is primarily due to  
359 its association with RLS (El Gewely *et al.*, 2018; Watanabe *et al.*, 2022). The consistent finding  
360 of *MEIS1* in GWAS for insomnia may represent a large proportion of undiagnosed RLS in the  
361 UK Biobank sample from which these data are derived (El Gewely *et al.*, 2018). *MEIS1*  
362 knockouts have shown hyperactive phenotypes in mice (Salminen *et al.*, 2017; Spieler *et al.*,  
363 2014), but it is unclear if this phenotype translates to sleep. Our model reveals a phenotype  
364 indicative of fragmented sleep that predominantly occurs at night, which is in line with the  
365 potential role in RLS, and implies that *MEIS1* is acting in a circadian pattern to alter arousal and  
366 sleep consolidation. These mutants also had an increase in nighttime sleep latency, which is a  
367 common characteristic of insomnia.

368  
369 Mutation of *skiv2l* in zebrafish significantly reduced sleep duration and had a modest effect in  
370 increasing sleep latency. In addition, these mutants showed daytime hyperactivity, suggesting a  
371 state of hyperarousal consistent with an insomnia-like condition. *SKIV2L* encodes the  
372 Superkiller Viralicilic Activity 2-Like RNA helicase and was 3D-mapped to the *MICB* GWAS  
373 locus (sentinel SNP rs3131638) on chromosome 6 (Palermo *et al.*, 2021). It is located within a  
374 conserved region of the major histocompatibility complex (Dangel *et al.*, 1995; Sultmann *et al.*,  
375 2000) and is believed to play a role in antiviral activity by blocking translation of poly(A) deficient  
376 mRNAs (Dangel *et al.*, 1995). *SKIV2L* is fairly highly conserved between zebrafish and humans  
377 with 60% overall amino acid conservation and >90% conservation of the specific sequence  
378 encoding the DEAD box helicase (Hu *et al.*, 2011), suggesting the role in RNA metabolism is  
379 particularly crucial. The mechanism by which *SKIV2L* acts to influence sleep is unknown;  
380 however, RNA metabolism is circadian-regulated and disturbed sleep has been shown to be



381 associated with alterations in RNA metabolism (Moller-Levet *et al.*, 2013). Loss-of-function in  
382 *SKIV2L* produced robust sleep phenotypes in both flies (Palermo *et al.*, 2021) and zebrafish,  
383 suggesting strong conservation of function related to this gene. Interestingly, the sleep duration  
384 phenotype was opposite in these two model organisms. Although the *SKIV2L* locus is  
385 conserved, the GWAS variant (intron of *MICB*) is not. This suggests that while *SKIV2L* acts to  
386 regulate sleep in both species, its interaction with regulatory factors within each species may  
387 differentially modulate the behavior.

388

389 *ARFGAP2* encodes the ADP Ribosylation Factor GTPase Activating Protein 2 and was 3D-  
390 mapped to the *NDUFS3* GWAS locus (sentinel SNP rs11605348) on chromosome 11 (Palermo  
391 *et al.*, 2021). It is 66% conserved at the amino acid level between human and zebrafish (Hu *et*  
392 *al.*, 2011) and is highly expressed early in development (Alliance of Genome Resources, 2020),  
393 likely explaining the developmental phenotype observed in our larval model.

394

395 *ARFGAP2* has not been extensively studied in the context of behavioral characteristics;  
396 however, it has been associated with synaptic plasticity (Colameo *et al.*, 2021; Zhang *et al.*,  
397 2012) and neurocognitive disorders including depression (Nagel *et al.*, 2018) and Alzheimer's  
398 disease (Gouveia *et al.*, 2022), which are both associated with disrupted sleep. The zebrafish  
399 harboring mutations in *arfgap2* appeared normal through early development (1-2 days post  
400 fertilization); however, by the third day, approximately half of the larvae began to appear  
401 abnormal with a curved tail. By 5 days post fertilization, when the sleep assay began, nearly all  
402 mutant larvae appeared developmentally abnormal; however, very few died. *Arfgap2* expression  
403 is high during this time frame and likely serves an important role during a critical period of  
404 development. Single cell RNA sequencing data show expression of *ARFGAP2* in skeletal  
405 myocytes (Karlsson *et al.*, 2021), which may contribute to the morphological and movement  
406 abnormalities.



407

408 ATAC-seq and promoter-focused capture C showed proxy SNPs at the *TCF12* insomnia GWAS  
409 locus contacting its own promoter (Palermo *et al.*, 2021). Human data indicate *TCF12* is highly  
410 expressed in oligodendrocytes and their precursors (Karlsson *et al.*, 2021) and controls  
411 oligodendroglial cell proliferation through transcriptional regulation (Wang *et al.*, 2014), which  
412 has been implicated in sleep regulation (Bellesi, 2015; Bellesi *et al.*, 2013). Although the sleep  
413 traits we measured in *tcf12* mutants showed modest effects (smd 0.34-0.48) that did not meet  
414 the significance threshold following multiple comparisons, their sleep was consistently abnormal  
415 across multiple nighttime parameters including nighttime waking activity, sleep bout number,  
416 and sleep bout length at night, indicating this transcription factor may play a role in night-specific  
417 activity regulation similar to *meis1*.

418

419 Surprisingly, we did not observe a significant phenotype in *gnb3a* mutants. This gene has been  
420 shown to be associated with sleep quality and diurnal preference in humans (Parsons *et al.*,  
421 2014) and is highly conserved in vertebrates (Ritchey *et al.*, 2010). Single cell RNA sequencing  
422 data indicate *GNB3* is most highly expressed in retinal cells (Karlsson *et al.*, 2021) and is  
423 associated with congenital stationary night blindness (Vincent *et al.*, 2016). While *gnb3* may be  
424 important for sensing changes to light that may influence diurnal activity regulation, zebrafish  
425 larvae have other photoreceptive cells that may compensate for loss of this gene (Fernandes *et*  
426 *al.*, 2012).

427

428 We did not observe significant changes to sleep or activity in *cbx1* mutant zebrafish. Our 3D  
429 genomics data identified multiple genes at this GWAS locus on chromosome 17 contacted by  
430 the insomnia-associated SNPs (Palermo *et al.*, 2021); therefore, this gene may not act  
431 independently in vertebrates to influence sleep-wake behaviors.

432

#### 433 4. Limitations

434 The current work was based on GWAS data primarily from individuals of European ancestry and  
435 may not be generalizable across all ancestral groups.

436

437 Several of these genes exhibit differential expression across development. In these  
438 experiments, we assayed larval zebrafish, while, in contrast, our previous work tested sleep in  
439 adult *Drosophila*. Knockdown of the *arfgap2* ortholog in *Drosophila* produced a significant  
440 reduction in sleep duration, yet the CRISPR mutation in zebrafish produced abnormal wake and  
441 sleep patterns paired with developmental abnormalities. The differences in phenotypes  
442 observed between larval zebrafish and adult *Drosophila* with perturbed *arfgap2* expression is  
443 likely due to developmental expression differences, demonstrating the benefit of cross-species  
444 and cross-development observation. Moreover, our experiments in *Drosophila* (Palermo *et al.*,  
445 2021) used neuron-specific RNA-interference to knockdown gene expression in neuronal cells,  
446 sparing expression elsewhere. This, too, likely contributed to the phenotypic differences  
447 observed.

448

449 Using F0 larvae for screening is a rapid and efficient approach for assaying sleep behavior to  
450 narrow long lists of candidate genes (Kroll *et al.*, 2021); however, it has inherent limitations.  
451 While we found that extremely little mosaicism was apparent in our larvae harboring the  
452 CRISPR mutations, there was a high degree of variability in behavior of both mutants and  
453 controls. The variability is possibly due to trauma induced by the injections, which is why we  
454 used scramble-sgRNA-injected controls for comparison. This variability likely diminishes true  
455 sleep-activity phenotypes and may result in false-negative results. Given we previously  
456 observed robust sleep phenotypes in *Drosophila* RNAi lines for these genes (Palermo *et al.*,  
457 2021), we cannot rule out those candidate genes that demonstrated minimal phenotypes;  
458 however this approach highlights those with particularly strong phenotypes in a vertebrate

459 model. Rather, future studies assessing stable F1 mutant lines represent a promising tool to  
460 assess these genes. Additionally, several of these genes are duplicated in zebrafish and one  
461 ortholog may offer compensatory action over the mutated gene. We chose to focus on the  
462 ortholog with strongest conservation across species as we hypothesized that this would be most  
463 consistent with the *Drosophila* screen; however, double knockouts are warranted in the future to  
464 assess behavior.

465

## 466 **5. Conclusion**

467 The genes examined in the current study were implicated as putative causal genes associated  
468 with insomnia GWAS signals through 3D genomics approaches and were shown to significantly  
469 impact invertebrate sleep characteristics indicating high conservation of function. We  
470 demonstrate that the orthologs of *SKIV2L* and *MEIS1* are deeply conserved and important for  
471 vertebrate sleep maintenance as well. We also find that *ARFGAP2* is required for proper  
472 development of motor behaviors to produce normal activity rhythms. This work also  
473 demonstrates the utility of employing cross-species paradigms to examine conserved behaviors,  
474 as we show that not all genes have strong conservation of function across different model  
475 organisms. Together, we provide rationale for the functional interrogation of GWAS-associated  
476 effector genes using large-scale screening approaches in model organisms to identify promising  
477 target genes for disease intervention.

478

## 479 **6. Methods**

### 480 *6.1 Animal use*

481 All experiments with zebrafish were conducted in accordance with the University of  
482 Pennsylvania Institutional Animal Care and Use Committee guidelines. Breeding pairs consisted  
483 of wild-type AB and TL (Tupfel Long-fin) strains. Fish were housed in standard conditions with

484 14-hour:10-hour light:dark cycle at 28.5°C, with lights on at 9 a.m (ZT0). and lights off at 11 p.m  
485 (ZT14).

486

## 487 *6.2 CRISPR/Cas9 mutagenesis*

488 Single guide RNAs (sgRNAs) were designed using the online tool Crispor  
489 (<http://crispor.tefor.net/>) with the reference genome set to “NCBI GRCz11” and the protospacer  
490 adjacent motif (PAM) set to “20bp-NGG-Sp Cas9, SpCas9-HF, eSpCas9 1.1.” sgRNAs were  
491 prioritized by specificity score (>95%) with 0 predicted off-targets with up to 3 mismatches. The  
492 zebrafish sequence was obtained using Ensembl (<https://useast.ensembl.org/>) with GRCz11 as  
493 the reference genome. Sequence was aligned to the human amino acid sequence using  
494 MARRVEL (<http://marrvel.org/>) to identify the region with highest conservation, and each sgRNA  
495 was designed targeting this conserved exonic region (**Supplementary Table 2**). AB/TL  
496 breeding pairs were set up overnight and embryos collected in embryonic growth media (E3  
497 medium; 5mM NaCl, 0.17 mM KCl, 0.33 mM CaCl<sub>2</sub>, 0.33 mM MgSO<sub>4</sub>) the following morning  
498 shortly after lights-on. Pre-formed ribonuclear protein (RNP) complexes containing the sgRNA  
499 and Cas9 enzyme were injected at the single-cell stage alternating between the gene group and  
500 scramble-injected negative control group. Embryos were left unperturbed for one day before  
501 being transported to fresh E3 media in petri dishes (approximately 50 per dish). All embryos and  
502 larvae were housed in an incubator at 28.5°C, with lights on at 9 a.m. (ZT0) and lights off at 11  
503 p.m (ZT14). Dead embryos and chorion membranes were removed daily until day 5 post  
504 fertilization. On day 5, CRISPR mutants and scramble-injected controls were pipetted into  
505 individual wells of a 96-well plate and placed into a zebra-box (Viewpoint Life Sciences) for  
506 automated video monitoring. Genotypes were placed into alternating rows to minimize location  
507 bias within the plate. Each zebra-box is sound-attenuating and contains circulating water held at  
508 a temperature of 28.5°C with automated lights cycling on the same 14-hour:10-hour light/dark

509 cycle. Sleep-wake behaviors were measured through automated video-tracking, as described  
510 previously (Kroll *et al.*, 2021; Palermo *et al.*, 2021; Rihel *et al.*, 2010).

511

### 512 *6.3 DNA extraction and PCR for genotyping*

513 DNA extraction was performed per the manufacturer's protocol (Quanta bio, Beverly, MA)  
514 immediately following completion of the sleep assay, as described previously (Palermo *et al.*,  
515 2021). Larvae were euthanized by rapid cooling on a mixture of ice and water between 2-4°C for  
516 a minimum of 30 minutes after complete cessation of movement was observed. Genotyping was  
517 performed on individual fish at the conclusion of each sleep assay. Either restriction digest or  
518 headloop PCR methods were used to validate mutations (Kroll *et al.*, 2021; Palermo *et al.*,  
519 2021; Rand *et al.*, 2005). Primers for genotyping are listed in **Supplementary Table 3**. All  
520 primers were run on a 2% agarose gel and sequence verified using Sanger sequencing to verify  
521 the target region.

522

### 523 *6.4 Data collection and analysis for sleep phenotyping*

524 Activity data were captured using automated video tracking (Viewpoint Life Sciences) software  
525 in quantization mode (Palermo *et al.*, 2021). As described previously (Chen *et al.*, 2017),  
526 threshold for detection was set as the following: detection threshold: 20; burst: 29; freeze: 3; bin  
527 size: 60 seconds. Data were processed using custom MATLAB scripts (Lee *et al.*, 2022) to  
528 calculate the following parameters for both day and night separately: sleep duration  
529 (minutes/hour), activity duration (seconds/hour), waking activity (seconds/awake minute/hour),  
530 sleep bout length (minutes/bout), sleep bout number (number/hour) and nighttime sleep latency  
531 (minutes). All animals were allowed to acclimate to the zebrabox for approximately 24 hours  
532 before beginning continuous data collection for 48 hours starting at lights-on.

533

### 534 *6.5 Arousal Threshold Assay*

535 A mechano-acoustic stimulus was used to determine arousal threshold using a protocol adapted  
536 from previous work (Reichert *et al.*, 2019; Singh *et al.*, 2015). Individual fish were placed into  
537 alternating columns of a 96-well plate (**Supplementary Fig. 5A**) to avoid location bias. Ten  
538 different vibration frequencies were applied, which consistently produced a step-wise increase  
539 in arousability. Frequencies were pseudo-randomly assigned to prevent acclimation to any  
540 given stimulus frequency throughout the trials. Frequency steps of 40Hz were ordered as  
541 follows: 560Hz, 400Hz, 520Hz, 720Hz, 440Hz, 680Hz, 480Hz, 760Hz, 600Hz, 640Hz. These ten  
542 frequencies were each presented ten times for 5 seconds every 3 minutes (5 seconds on, 2  
543 mins 55 seconds off) beginning at 1 a.m. (ZT16) and ending at 6 a.m. (ZT21) (**Supplementary**  
544 **Fig. 5B**). Lower frequencies produced larger changes in movement and an increase in the  
545 fraction of responsive larvae. Therefore, analyses were presented as highest-to-lowest  
546 frequency representing lowest-to-highest intensity of stimulation (i.e. 760Hz, 720Hz, 680Hz,  
547 640Hz, 600Hz, 560Hz, 520Hz, 480Hz, 440Hz, 400Hz). The response to stimuli was measured  
548 by automated video tracking and analyzed using Matlab (Mathworks) and Excel (Microsoft). The  
549 response fraction represents the percentage of larvae considered to be asleep during the 5  
550 second pre-stimulus baseline (activity <0.01s/5sec, determined empirically using average  
551 movement prestimulus) and whose activity increased over baseline during the stimulus  
552 presentation. Curve-fit and statistical analyses were carried out in Prism V9 (Graphpad) using  
553 non-linear regression (Agonist vs Response--Variable slope (four parameters)) with extra sum-  
554 of-squares F-test used to compare EC50 (half-maximal response) and top (maximal response)  
555 as described previously (Singh *et al.*, 2015).

556

### 557 *6.6 Statistical analysis and control for multiple comparisons across sleep traits*

558 Continuous data are summarized using means and 95% confidence intervals (CI). Effect sizes  
559 are described as standardized mean difference (smd). Phenotypes of interest included a total of  
560 eleven measurements related to sleep and activity, including day and night sleep duration,

561 activity, waking activity, sleep bout length, and sleep bout number, as well as nocturnal sleep  
562 latency. Analyses compared these traits between scramble-injected and CRIPSR mutant fish for  
563 six different candidate genes – *skiv2l*, *meis1b*, *gnb3a*, *cbx1b*, *tcf12*, and *arfgap2*. Primary  
564 comparisons between mutant and scramble-injected fish were performed using non-parametric  
565 Wilcoxon rank-sum tests to mitigate any potential impact of non-normality of the endpoints. A  
566 Hochberg step-up procedure (Hochberg, 1988; Huang and Hsu, 2007) was applied to the  
567 analysis of each gene to maintain gene-specific type I error at the desired level of 0.05 across  
568 the tested hypotheses. Briefly, to implement the Hochberg method the p-values for the set of  
569 eleven null hypotheses are ordered from largest to smallest, and each p-value is compared to a  
570 sequentially decreasing alpha-level to determine whether the associated null hypothesis (and  
571 subsequent hypotheses) should be rejected. Symbolically, for the set of p-values  $\{p_1, \dots, p_{11}\}$ ,  
572 ordered from largest to smallest and testing the corresponding set of null hypotheses  $\{H_{01}, \dots$   
573  $H_{011}\}$ , the procedure is implemented as:

574 **Step 1:** Evaluate whether  $p_1 < 0.05$ . If yes, reject  $H_{01}$  and all subsequent null hypotheses  
575  $\{H_{02}, \dots, H_{011}\}$ . Else, do not reject  $H_{01}$  and go to Step 2.

576 **Step 2:** Evaluate whether  $p_2 < 0.05/2$ . If yes, reject  $H_{02}$  and all subsequent null hypotheses  
577  $\{H_{03}, \dots, H_{011}\}$ . Else, do not reject  $H_{02}$  and go to Step 3.

578 [...]

579 **Step 11:** Evaluate whether  $p_k < 0.05/11$ . If yes, reject  $H_{011}$ . Else, none of the null hypotheses  
580  $\{H_{01}, \dots, H_{011}\}$  are rejected and stop.

581 Comparisons may be significant by the rank sum analysis but not reach the threshold for  
582 significance following multiple comparisons using the Hochberg approach described. In this  
583 case, results should be interpreted with caution.

584

585 **Acknowledgements**

586 The work was supported by NIH grant T32 HL07953, R01 HL143790, and P01 HL094307. Dr.  
587 Grant is supported by NIH awards R01 AG057516 and R01 HD056465 and the Daniel B. Burke  
588 Endowed Chair.

589

## 590 **Disclosure Statement**

591 The authors have nothing to disclose.

592

## 593 **Author contributions**

594 A.J.Z. designed and carried out experiments, analyzed data, and wrote and edited the  
595 manuscript. F.D.B. assisted with experiments and edited the manuscript. B.T.K. performed  
596 statistical analyses and edited the manuscript. Z.Y.S. assisted with experiments. J.P., A.C.,  
597 S.S., M.C.P., E.B.B., J.A.P., A.D.W., O.J.V., D.R.M., and A.K., assisted with experimental  
598 design, data collection, interpretation, and edited the manuscript. P.R.G., A.C.K., S.F.G., and  
599 A.I.P conceptualized and designed experiments and contributed to writing and editing the  
600 manuscript.

601

## 602 **References**

603

- 604 Alliance of Genome Resources, C., 2020. Alliance of Genome Resources Portal: unified model  
605 organism research platform. *Nucleic Acids Res* 48, D650-D658.
- 606 Association, A.P., 2013. *Diagnostic and statistical manual of mental disorders*
- 607 Barlow, I.L., Rihel, J., 2017. Zebrafish sleep: from geneZZZ to neuronZZZ. *Curr Opin*  
608 *Neurobiol* 44, 65-71.
- 609 Bellesi, M., 2015. Sleep and oligodendrocyte functions. *Curr Sleep Med Rep* 1, 20-26.
- 610 Bellesi, M., Pfister-Genskow, M., Maret, S., Keles, S., Tononi, G., Cirelli, C., 2013. Effects of  
611 sleep and wake on oligodendrocytes and their precursors. *J Neurosci* 33, 14288-14300.
- 612 Bonnet, M.H., Arand, D.L., 2000. Activity, arousal, and the MSLT in patients with insomnia.  
613 *Sleep* 23, 205-212.
- 614 Chen, M.C., Chang, C., Glover, G.H., Gotlib, I.H., 2014. Increased insula coactivation with  
615 salience networks in insomnia. *Biol Psychol* 97, 1-8.



- 616 Chen, S., Reichert, S., Singh, C., Oikonomou, G., Rihel, J., Prober, D.A., 2017. Light-Dependent  
617 Regulation of Sleep and Wake States by Prokineticin 2 in Zebrafish. *Neuron* 95, 153-168  
618 e156.
- 619 Chesi, A., Wagley, Y., Johnson, M.E., Manduchi, E., Su, C., Lu, S., Leonard, M.E., Hodge,  
620 K.M., Pippin, J.A., Hankenson, K.D., Wells, A.D., Grant, S.F.A., 2019. Genome-scale  
621 Capture C promoter interactions implicate effector genes at GWAS loci for bone mineral  
622 density. *Nat Commun* 10, 1260.
- 623 Chiu, C.N., Prober, D.A., 2013. Regulation of zebrafish sleep and arousal states: current and  
624 prospective approaches. *Front Neural Circuits* 7, 58.
- 625 Claussnitzer, M., Cho, J.H., Collins, R., Cox, N.J., Dermitzakis, E.T., Hurles, M.E., Kathiresan,  
626 S., Kenny, E.E., Lindgren, C.M., MacArthur, D.G., North, K.N., Plon, S.E., Rehm, H.L.,  
627 Risch, N., Rotimi, C.N., Shendure, J., Soranzo, N., McCarthy, M.I., 2020. A brief history  
628 of human disease genetics. *Nature* 577, 179-189.
- 629 Colameo, D., Rajman, M., Soutschek, M., Bicker, S., von Ziegler, L., Bohacek, J., Winterer, J.,  
630 Germain, P.L., Dieterich, C., Schratt, G., 2021. Pervasive compartment-specific  
631 regulation of gene expression during homeostatic synaptic scaling. *EMBO Rep* 22,  
632 e52094.
- 633 Dangel, A.W., Shen, L., Mendoza, A.R., Wu, L.C., Yu, C.Y., 1995. Human helicase gene  
634 SKI2W in the HLA class III region exhibits striking structural similarities to the yeast  
635 antiviral gene SKI2 and to the human gene KIAA0052: emergence of a new gene family.  
636 *Nucleic Acids Res* 23, 2120-2126.
- 637 Dashti, H.S., Jones, S.E., Wood, A.R., Lane, J.M., van Hees, V.T., Wang, H., Rhodes, J.A.,  
638 Song, Y., Patel, K., Anderson, S.G., Beaumont, R.N., Bechtold, D.A., Bowden, J., Cade,  
639 B.E., Garaulet, M., Kyle, S.D., Little, M.A., Loudon, A.S., Luik, A.I., Scheer, F.,  
640 Spiegelhalter, K., Tyrrell, J., Gottlieb, D.J., Tiemeier, H., Ray, D.W., Purcell, S.M.,  
641 Frayling, T.M., Redline, S., Lawlor, D.A., Rutter, M.K., Weedon, M.N., Saxena, R.,  
642 2019. Genome-wide association study identifies genetic loci for self-reported habitual  
643 sleep duration supported by accelerometer-derived estimates. *Nat Commun* 10, 1100.
- 644 El Gewely, M., Welman, M., Xiong, L., Yin, S., Catoire, H., Rouleau, G., Montplaisir, J.Y.,  
645 Desautels, A., Warby, S.C., 2018. Reassessing GWAS findings for the shared genetic  
646 basis of insomnia and restless legs syndrome. *Sleep* 41.
- 647 Fernandes, A.M., Fero, K., Arrenberg, A.B., Bergeron, S.A., Driever, W., Burgess, H.A., 2012.  
648 Deep brain photoreceptors control light-seeking behavior in zebrafish larvae. *Curr Biol*  
649 22, 2042-2047.
- 650 Fernandez-Mendoza, J., 2017. The insomnia with short sleep duration phenotype: an update on  
651 it's importance for health and prevention. *Curr Opin Psychiatry* 30, 56-63.
- 652 Fernandez-Mendoza, J., Li, Y., Vgontzas, A.N., Fang, J., Gaines, J., Calhoun, S.L., Liao, D.,  
653 Bixler, E.O., 2016. Insomnia is Associated with Cortical Hyperarousal as Early as  
654 Adolescence. *Sleep* 39, 1029-1036.
- 655 Forgetta, V., Jiang, L., Vulpescu, N.A., Hogan, M.S., Chen, S., Morris, J.A., Grinek, S., Benner,  
656 C., Jang, D.K., Hoang, Q., Burt, N., Flannick, J.A., McCarthy, M.I., Fauman, E.,  
657 Greenwood, C.M.T., Maurano, M.T., Richards, J.B., 2022. An effector index to predict  
658 target genes at GWAS loci. *Hum Genet* 141, 1431-1447.
- 659 Freeman, A.A., Syed, S., Sanyal, S., 2013. Modeling the genetic basis for human sleep disorders  
660 in *Drosophila*. *Commun Integr Biol* 6, e22733.

- 661 Fulco, C.P., Nasser, J., Jones, T.R., Munson, G., Bergman, D.T., Subramanian, V., Grossman,  
662 S.R., Anyoha, R., Doughty, B.R., Patwardhan, T.A., Nguyen, T.H., Kane, M., Perez,  
663 E.M., Durand, N.C., Lareau, C.A., Stamenova, E.K., Aiden, E.L., Lander, E.S., Engreitz,  
664 J.M., 2019. Activity-by-contact model of enhancer-promoter regulation from thousands  
665 of CRISPR perturbations. *Nat Genet* 51, 1664-1669.
- 666 Gouveia, C., Gibbons, E., Dehghani, N., Eapen, J., Guerreiro, R., Bras, J., 2022. Genome-wide  
667 association of polygenic risk extremes for Alzheimer's disease in the UK Biobank. *Sci*  
668 *Rep* 12, 8404.
- 669 Hammerschlag, A.R., Stringer, S., de Leeuw, C.A., Sniekers, S., Taskesen, E., Watanabe, K.,  
670 Blanken, T.F., Dekker, K., Te Lindert, B.H.W., Wassing, R., Jonsdottir, I., Thorleifsson,  
671 G., Stefansson, H., Gislason, T., Berger, K., Schormair, B., Wellmann, J., Winkelmann,  
672 J., Stefansson, K., Oexle, K., Van Someren, E.J.W., Posthuma, D., 2017. Genome-wide  
673 association analysis of insomnia complaints identifies risk genes and genetic overlap with  
674 psychiatric and metabolic traits. *Nat Genet* 49, 1584-1592.
- 675 Hendricks, J.C., Sehgal, A., Pack, A.I., 2000. The need for a simple animal model to understand  
676 sleep. *Prog Neurobiol* 61, 339-351.
- 677 Hochberg, Y., 1988. *A sharper bonferroni procedure for multiple tests of significance*. New  
678 York University Graduate School of Business Administration.
- 679 Howe, K., Clark, M.D., Torroja, C.F., Torrance, J., Berthelot, C., Muffato, M., Collins, J.E.,  
680 Humphray, S., McLaren, K., Matthews, L., McLaren, S., Sealy, I., Caccamo, M.,  
681 Churcher, C., Scott, C., Barrett, J.C., Koch, R., Rauch, G.J., White, S., Chow, W., Kilian,  
682 B., Quintais, L.T., Guerra-Assuncao, J.A., Zhou, Y., Gu, Y., Yen, J., Vogel, J.H., Eyre,  
683 T., Redmond, S., Banerjee, R., Chi, J., Fu, B., Langley, E., Maguire, S.F., Laird, G.K.,  
684 Lloyd, D., Kenyon, E., Donaldson, S., Sehra, H., Almeida-King, J., Loveland, J.,  
685 Trevanion, S., Jones, M., Quail, M., Willey, D., Hunt, A., Burton, J., Sims, S., McLay,  
686 K., Plumb, B., Davis, J., Clee, C., Oliver, K., Clark, R., Riddle, C., Elliot, D.,  
687 Threadgold, G., Harden, G., Ware, D., Begum, S., Mortimore, B., Kerry, G., Heath, P.,  
688 Phillimore, B., Tracey, A., Corby, N., Dunn, M., Johnson, C., Wood, J., Clark, S., Pelan,  
689 S., Griffiths, G., Smith, M., Glithero, R., Howden, P., Barker, N., Lloyd, C., Stevens, C.,  
690 Harley, J., Holt, K., Panagiotidis, G., Lovell, J., Beasley, H., Henderson, C., Gordon, D.,  
691 Auger, K., Wright, D., Collins, J., Raisen, C., Dyer, L., Leung, K., Robertson, L.,  
692 Ambridge, K., Leongamornlert, D., McGuire, S., Gilderthorp, R., Griffiths, C.,  
693 Manthavadi, D., Nichol, S., Barker, G., Whitehead, S., Kay, M., Brown, J., Murnane, C.,  
694 Gray, E., Humphries, M., Sycamore, N., Barker, D., Saunders, D., Wallis, J., Babbage,  
695 A., Hammond, S., Mashreghi-Mohammadi, M., Barr, L., Martin, S., Wray, P., Ellington,  
696 A., Matthews, N., Ellwood, M., Woodmansey, R., Clark, G., Cooper, J., Tromans, A.,  
697 Grafham, D., Skuce, C., Pandian, R., Andrews, R., Harrison, E., Kimberley, A., Garnett,  
698 J., Fosker, N., Hall, R., Garner, P., Kelly, D., Bird, C., Palmer, S., Gehring, I., Berger, A.,  
699 Dooley, C.M., Ersan-Urun, Z., Eser, C., Geiger, H., Geisler, M., Karotki, L., Kirn, A.,  
700 Konantz, J., Konantz, M., Oberlander, M., Rudolph-Geiger, S., Teucke, M., Lanz, C.,  
701 Raddatz, G., Osoegawa, K., Zhu, B., Rapp, A., Widaa, S., Langford, C., Yang, F.,  
702 Schuster, S.C., Carter, N.P., Harrow, J., Ning, Z., Herrero, J., Searle, S.M., Enright, A.,  
703 Geisler, R., Plasterk, R.H., Lee, C., Westerfield, M., de Jong, P.J., Zon, L.I., Postlethwait,  
704 J.H., Nusslein-Volhard, C., Hubbard, T.J., Roest Crolius, H., Rogers, J., Stemple, D.L.,  
705 2013. The zebrafish reference genome sequence and its relationship to the human  
706 genome. *Nature* 496, 498-503.

- 707 Hu, Y., Flockhart, I., Vinayagam, A., Bergwitz, C., Berger, B., Perrimon, N., Mohr, S.E., 2011.  
708 An integrative approach to ortholog prediction for disease-focused and other functional  
709 studies. *BMC Bioinformatics* 12, 357.
- 710 Huang, Y., Hsu, J.C., 2007. Hochberg's Step-up Method: Cutting Corners off Holm's Step-down  
711 Method. *Biometrika* 94, 965-975.
- 712 Jansen, P.R., Watanabe, K., Stringer, S., Skene, N., Bryois, J., Hammerschlag, A.R., de Leeuw,  
713 C.A., Benjamins, J.S., Munoz-Manchado, A.B., Nagel, M., Savage, J.E., Tiemeier, H.,  
714 White, T., andMe Research, T., Tung, J.Y., Hinds, D.A., Vacic, V., Wang, X., Sullivan,  
715 P.F., van der Sluis, S., Polderman, T.J.C., Smit, A.B., Hjerling-Leffler, J., Van Someren,  
716 E.J.W., Posthuma, D., 2019. Genome-wide analysis of insomnia in 1,331,010 individuals  
717 identifies new risk loci and functional pathways. *Nat Genet* 51, 394-403.
- 718 Kalmbach, D.A., Cuamatzi-Castelan, A.S., Tonnu, C.V., Tran, K.M., Anderson, J.R., Roth, T.,  
719 Drake, C.L., 2018. Hyperarousal and sleep reactivity in insomnia: current insights. *Nat*  
720 *Sci Sleep* 10, 193-201.
- 721 Karlsson, M., Zhang, C., Mear, L., Zhong, W., Digre, A., Katona, B., Sjostedt, E., Butler, L.,  
722 Odeberg, J., Dusart, P., Edfors, F., Oksvold, P., von Feilitzen, K., Zwahlen, M., Arif, M.,  
723 Altay, O., Li, X., Ozcan, M., Mardinoglu, A., Fagerberg, L., Mulder, J., Luo, Y., Ponten,  
724 F., Uhlen, M., Lindskog, C., 2021. A single-cell type transcriptomics map of human  
725 tissues. *Sci Adv* 7.
- 726 Kroll, F., Powell, G.T., Ghosh, M., Gestri, G., Antinucci, P., Hearn, T.J., Tunbak, H., Lim, S.,  
727 Dennis, H.W., Fernandez, J.M., Whitmore, D., Dreosti, E., Wilson, S.W., Hoffman, E.J.,  
728 Rihel, J., 2021. A simple and effective F0 knockout method for rapid screening of  
729 behaviour and other complex phenotypes. *Elife* 10.
- 730 Lam, D.D., Antic Nikolic, A., Zhao, C., Mirza-Schreiber, N., Krezel, W., Oexle, K.,  
731 Winkelmann, J., 2022. Intronic elements associated with insomnia and restless legs  
732 syndrome exhibit cell-type-specific epigenetic features contributing to MEIS1 regulation.  
733 *Hum Mol Genet* 31, 1733-1746.
- 734 Lane, J.M., Liang, J., Vlasac, I., Anderson, S.G., Bechtold, D.A., Bowden, J., Emsley, R., Gill,  
735 S., Little, M.A., Luik, A.I., Loudon, A., Scheer, F.A., Purcell, S.M., Kyle, S.D., Lawlor,  
736 D.A., Zhu, X., Redline, S., Ray, D.W., Rutter, M.K., Saxena, R., 2017. Genome-wide  
737 association analyses of sleep disturbance traits identify new loci and highlight shared  
738 genetics with neuropsychiatric and metabolic traits. *Nat Genet* 49, 274-281.
- 739 Lappalainen, T., MacArthur, D.G., 2021. From variant to function in human disease genetics.  
740 *Science* 373, 1464-1468.
- 741 Lasconi, C., Pahl, M.C., Cousminer, D.L., Doege, C.A., Chesi, A., Hodge, K.M., Leonard, M.E.,  
742 Lu, S., Johnson, M.E., Su, C., Hammond, R.K., Pippin, J.A., Terry, N.A., Ghanem, L.R.,  
743 Leibel, R.L., Wells, A.D., Grant, S.F.A., 2021. Variant-to-Gene-Mapping Analyses  
744 Reveal a Role for the Hypothalamus in Genetic Susceptibility to Inflammatory Bowel  
745 Disease. *Cell Mol Gastroenterol Hepatol* 11, 667-682.
- 746 Lasconi, C., Pahl, M.C., Pippin, J.A., Su, C., Johnson, M.E., Chesi, A., Boehm, K., Manduchi,  
747 E., Ou, K., Golson, M.L., Wells, A.D., Kaestner, K.H., Grant, S.F.A., 2022. Variant-to-  
748 gene-mapping analyses reveal a role for pancreatic islet cells in conferring genetic  
749 susceptibility to sleep-related traits. *Sleep* 45.
- 750 Lee, D.A., Oikonomou, G., Prober, D.A., 2022. Large-scale Analysis of Sleep in Zebrafish. *Bio*  
751 *Protoc* 12, e4313.

- 752 Mahowald, M.W., Schenck, C.H., 2005. Insights from studying human sleep disorders. *Nature*  
753 437, 1279-1285.
- 754 Martin, J.L., Fiorentino, L., Jouldjian, S., Mitchell, M., Josephson, K.R., Alessi, C.A., 2011.  
755 Poor self-reported sleep quality predicts mortality within one year of inpatient post-acute  
756 rehabilitation among older adults. *Sleep* 34, 1715-1721.
- 757 Moller-Levet, C.S., Archer, S.N., Bucca, G., Laing, E.E., Slak, A., Kabiljo, R., Lo, J.C., Santhi,  
758 N., von Schantz, M., Smith, C.P., Dijk, D.J., 2013. Effects of insufficient sleep on  
759 circadian rhythmicity and expression amplitude of the human blood transcriptome. *Proc*  
760 *Natl Acad Sci U S A* 110, E1132-1141.
- 761 Morin, C.M., Drake, C.L., Harvey, A.G., Krystal, A.D., Manber, R., Riemann, D., Spiegelhalter,  
762 K., 2015. Insomnia disorder. *Nat Rev Dis Primers* 1, 15026.
- 763 Moskow, J.J., Bullrich, F., Huebner, K., Daar, I.O., Buchberg, A.M., 1995. Meis1, a PBX1-  
764 related homeobox gene involved in myeloid leukemia in BXH-2 mice. *Mol Cell Biol* 15,  
765 5434-5443.
- 766 Nagel, M., Jansen, P.R., Stringer, S., Watanabe, K., de Leeuw, C.A., Bryois, J., Savage, J.E.,  
767 Hammerschlag, A.R., Skene, N.G., Munoz-Manchado, A.B., andMe Research, T., White,  
768 T., Tiemeier, H., Linnarsson, S., Hjerling-Leffler, J., Polderman, T.J.C., Sullivan, P.F.,  
769 van der Sluis, S., Posthuma, D., 2018. Meta-analysis of genome-wide association studies  
770 for neuroticism in 449,484 individuals identifies novel genetic loci and pathways. *Nat*  
771 *Genet* 50, 920-927.
- 772 Pahl, M.C., Doege, C.A., Hodge, K.M., Littleton, S.H., Leonard, M.E., Lu, S., Rausch, R.,  
773 Pippin, J.A., De Rosa, M.C., Basak, A., Bradfield, J.P., Hammond, R.K., Boehm, K.,  
774 Berkowitz, R.I., Lasconi, C., Su, C., Chesi, A., Johnson, M.E., Wells, A.D., Voight, B.F.,  
775 Leibel, R.L., Cousminer, D.L., Grant, S.F.A., 2021. Cis-regulatory architecture of human  
776 ESC-derived hypothalamic neuron differentiation aids in variant-to-gene mapping of  
777 relevant complex traits. *Nat Commun* 12, 6749.
- 778 Palermo, J., Chesi, A., Zimmerman, A., Sonti, S., Lasconi, C., Brown, E.B., Pippin, J.A., Wells,  
779 A.D., Doldur-Balli, F., Mazzotti, D.R., Pack, A.I., Gehrman, P.R., Grant, S.F.A., Keene,  
780 A.C., 2021. Variant-to-gene-mapping followed by cross-species genetic screening  
781 identifies GPI-anchor biosynthesis as novel regulator of sleep. *bioRxiv*,  
782 2021.2012.2019.472248.
- 783 Parsons, M.J., Lester, K.J., Barclay, N.L., Archer, S.N., Nolan, P.M., Eley, T.C., Gregory, A.M.,  
784 2014. Polymorphisms in the circadian expressed genes PER3 and ARNTL2 are  
785 associated with diurnal preference and GNBeta3 with sleep measures. *J Sleep Res* 23,  
786 595-604.
- 787 Prober, D.A., Rihel, J., Onah, A.A., Sung, R.J., Schier, A.F., 2006. Hypocretin/orexin  
788 overexpression induces an insomnia-like phenotype in zebrafish. *J Neurosci* 26, 13400-  
789 13410.
- 790 Rand, K.N., Ho, T., Qu, W., Mitchell, S.M., White, R., Clark, S.J., Molloy, P.L., 2005. Headloop  
791 suppression PCR and its application to selective amplification of methylated DNA  
792 sequences. *Nucleic Acids Res* 33, e127.
- 793 Reichert, S., Pavon Arocas, O., Rihel, J., 2019. The Neuropeptide Galanin Is Required for  
794 Homeostatic Rebound Sleep following Increased Neuronal Activity. *Neuron* 104, 370-  
795 384 e375.
- 796 Rihel, J., Prober, D.A., Schier, A.F., 2010. Monitoring sleep and arousal in zebrafish. *Methods*  
797 *Cell Biol* 100, 281-294.



- 798 Ritchey, E.R., Bongini, R.E., Code, K.A., Zelinka, C., Petersen-Jones, S., Fischer, A.J., 2010.  
799 The pattern of expression of guanine nucleotide-binding protein beta3 in the retina is  
800 conserved across vertebrate species. *Neuroscience* 169, 1376-1391.
- 801 Salminen, A.V., Garrett, L., Schormair, B., Rozman, J., Giesert, F., Niedermeier, K.M., Becker,  
802 L., Rathkolb, B., Racz, I., German Mouse Clinic, C., Klingenspor, M., Klopstock, T.,  
803 Wolf, E., Zimmer, A., Gailus-Durner, V., Torres, M., Fuchs, H., Hrabe de Angelis, M.,  
804 Wurst, W., Holter, S.M., Winkelmann, J., 2017. Meis1: effects on motor phenotypes and  
805 the sensorimotor system in mice. *Dis Model Mech* 10, 981-991.
- 806 Schulte, E.C., Kousi, M., Tan, P.L., Tilch, E., Knauf, F., Lichtner, P., Trenkwalder, C., Hogg, B.,  
807 Frauscher, B., Berger, K., Fietze, I., Hornyak, M., Oertel, W.H., Bachmann, C.G.,  
808 Zimprich, A., Peters, A., Gieger, C., Meitinger, T., Muller-Myhsok, B., Katsanis, N.,  
809 Winkelmann, J., 2014. Targeted resequencing and systematic in vivo functional testing  
810 identifies rare variants in MEIS1 as significant contributors to restless legs syndrome. *Am*  
811 *J Hum Genet* 95, 85-95.
- 812 Singh, C., Oikonomou, G., Prober, D.A., 2015. Norepinephrine is required to promote  
813 wakefulness and for hypocretin-induced arousal in zebrafish. *Elife* 4, e07000.
- 814 Smemo, S., Tena, J.J., Kim, K.H., Gamazon, E.R., Sakabe, N.J., Gomez-Marin, C., Aneas, I.,  
815 Credidio, F.L., Sobreira, D.R., Wasserman, N.F., Lee, J.H., Puviondran, V., Tam, D.,  
816 Shen, M., Son, J.E., Vakili, N.A., Sung, H.K., Naranjo, S., Acemel, R.D., Manzanares,  
817 M., Nagy, A., Cox, N.J., Hui, C.C., Gomez-Skarmeta, J.L., Nobrega, M.A., 2014.  
818 Obesity-associated variants within FTO form long-range functional connections with  
819 IRX3. *Nature* 507, 371-375.
- 820 Spieler, D., Kaffe, M., Knauf, F., Bessa, J., Tena, J.J., Giesert, F., Schormair, B., Tilch, E., Lee,  
821 H., Horsch, M., Czamara, D., Karbalai, N., von Toerne, C., Waldenberger, M., Gieger,  
822 C., Lichtner, P., Claussnitzer, M., Naumann, R., Muller-Myhsok, B., Torres, M., Garrett,  
823 L., Rozman, J., Klingenspor, M., Gailus-Durner, V., Fuchs, H., Hrabe de Angelis, M.,  
824 Beckers, J., Holter, S.M., Meitinger, T., Hauck, S.M., Laumen, H., Wurst, W., Casares,  
825 F., Gomez-Skarmeta, J.L., Winkelmann, J., 2014. Restless legs syndrome-associated  
826 intronic common variant in Meis1 alters enhancer function in the developing  
827 telencephalon. *Genome Res* 24, 592-603.
- 828 Stranges, S., Tigbe, W., Gomez-Olive, F.X., Thorogood, M., Kandala, N.B., 2012. Sleep  
829 problems: an emerging global epidemic? Findings from the INDEPTH WHO-SAGE  
830 study among more than 40,000 older adults from 8 countries across Africa and Asia.  
831 *Sleep* 35, 1173-1181.
- 832 Su, C., Argenziano, M., Lu, S., Pippin, J.A., Pahl, M.C., Leonard, M.E., Cousminer, D.L.,  
833 Johnson, M.E., Lasconi, C., Wells, A.D., Chesi, A., Grant, S.F.A., 2021. 3D promoter  
834 architecture re-organization during iPSC-derived neuronal cell differentiation implicates  
835 target genes for neurodevelopmental disorders. *Prog Neurobiol* 201, 102000.
- 836 Su, C., Johnson, M.E., Torres, A., Thomas, R.M., Manduchi, E., Sharma, P., Mehra, P., Le Coz,  
837 C., Leonard, M.E., Lu, S., Hodge, K.M., Chesi, A., Pippin, J., Romberg, N., Grant,  
838 S.F.A., Wells, A.D., 2020. Mapping effector genes at lupus GWAS loci using promoter  
839 Capture-C in follicular helper T cells. *Nat Commun* 11, 3294.
- 840 Sultmann, H., Sato, A., Murray, B.W., Takezaki, N., Geisler, R., Rauch, G.J., Klein, J., 2000.  
841 Conservation of Mhc class III region synteny between zebrafish and human as  
842 determined by radiation hybrid mapping. *J Immunol* 165, 6984-6993.

- 843 Tam, V., Patel, N., Turcotte, M., Bosse, Y., Pare, G., Meyre, D., 2019. Benefits and limitations  
844 of genome-wide association studies. *Nat Rev Genet* 20, 467-484.
- 845 Thireau, J., Farah, C., Molinari, N., Bouilloux, F., Torreilles, L., Winkelmann, J., Scholz, S.,  
846 Richard, S., Dauvilliers, Y., Marmigere, F., 2017. MEIS1 variant as a determinant of  
847 autonomic imbalance in Restless Legs Syndrome. *Sci Rep* 7, 46620.
- 848 Tran, S., Prober, D.A., 2022. Validation of Candidate Sleep Disorder Risk Genes Using  
849 Zebrafish. *Front Mol Neurosci* 15, 873520.
- 850 Vincent, A., Audo, I., Tavares, E., Maynes, J.T., Tumber, A., Wright, T., Li, S., Michiels, C.,  
851 Consortium, G.N.B., Condroyer, C., MacDonald, H., Verdet, R., Sahel, J.A., Hamel,  
852 C.P., Zeitz, C., Heon, E., 2016. Biallelic Mutations in GNB3 Cause a Unique Form of  
853 Autosomal-Recessive Congenital Stationary Night Blindness. *Am J Hum Genet* 98, 1011-  
854 1019.
- 855 Wallace, M.L., Stone, K., Smagula, S.F., Hall, M.H., Simsek, B., Kado, D.M., Redline, S., Vo,  
856 T.N., Buysse, D.J., Osteoporotic Fractures in Men Study Research, G., 2018. Which  
857 Sleep Health Characteristics Predict All-Cause Mortality in Older Men? An Application  
858 of Flexible Multivariable Approaches. *Sleep* 41.
- 859 Wang, J., Pol, S.U., Haberman, A.K., Wang, C., O'Bara, M.A., Sim, F.J., 2014. Transcription  
860 factor induction of human oligodendrocyte progenitor fate and differentiation. *Proc Natl*  
861 *Acad Sci U S A* 111, E2885-2894.
- 862 Watanabe, K., Jansen, P.R., Savage, J.E., Nandakumar, P., Wang, X., andMe Research, T.,  
863 Hinds, D.A., Gelernter, J., Levey, D.F., Polimanti, R., Stein, M.B., Van Someren, E.J.W.,  
864 Smit, A.B., Posthuma, D., 2022. Genome-wide meta-analysis of insomnia prioritizes  
865 genes associated with metabolic and psychiatric pathways. *Nat Genet* 54, 1125-1132.
- 866 Zhang, G., Neubert, T.A., Jordan, B.A., 2012. RNA binding proteins accumulate at the  
867 postsynaptic density with synaptic activity. *J Neurosci* 32, 599-609.
- 868 Zhdanova, I.V., Wang, S.Y., Leclair, O.U., Danilova, N.P., 2001. Melatonin promotes sleep-like  
869 state in zebrafish. *Brain Res* 903, 263-268.
- 870

### Variant-to-gene mapping for insomnia GWAS loci

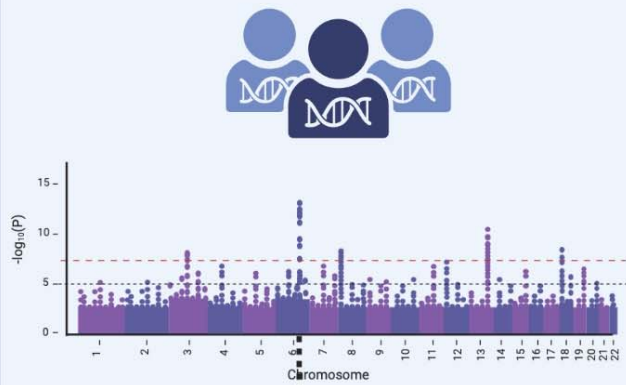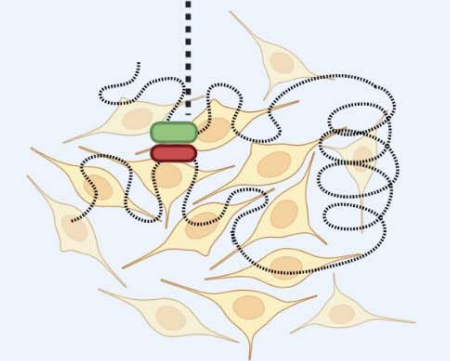

Identify candidate effector genes

### Screen candidate effector genes for sleep-wake behaviors using *Drosophila* RNAi

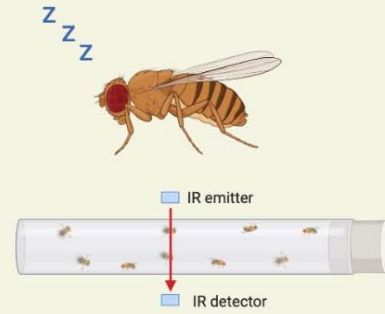

### Determine conservation of function in vertebrate model using CRISPR-Cas9

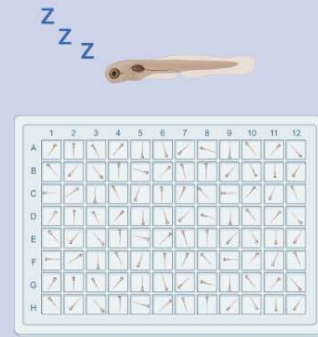

**Graphical Abstract.** Created using BioRender.

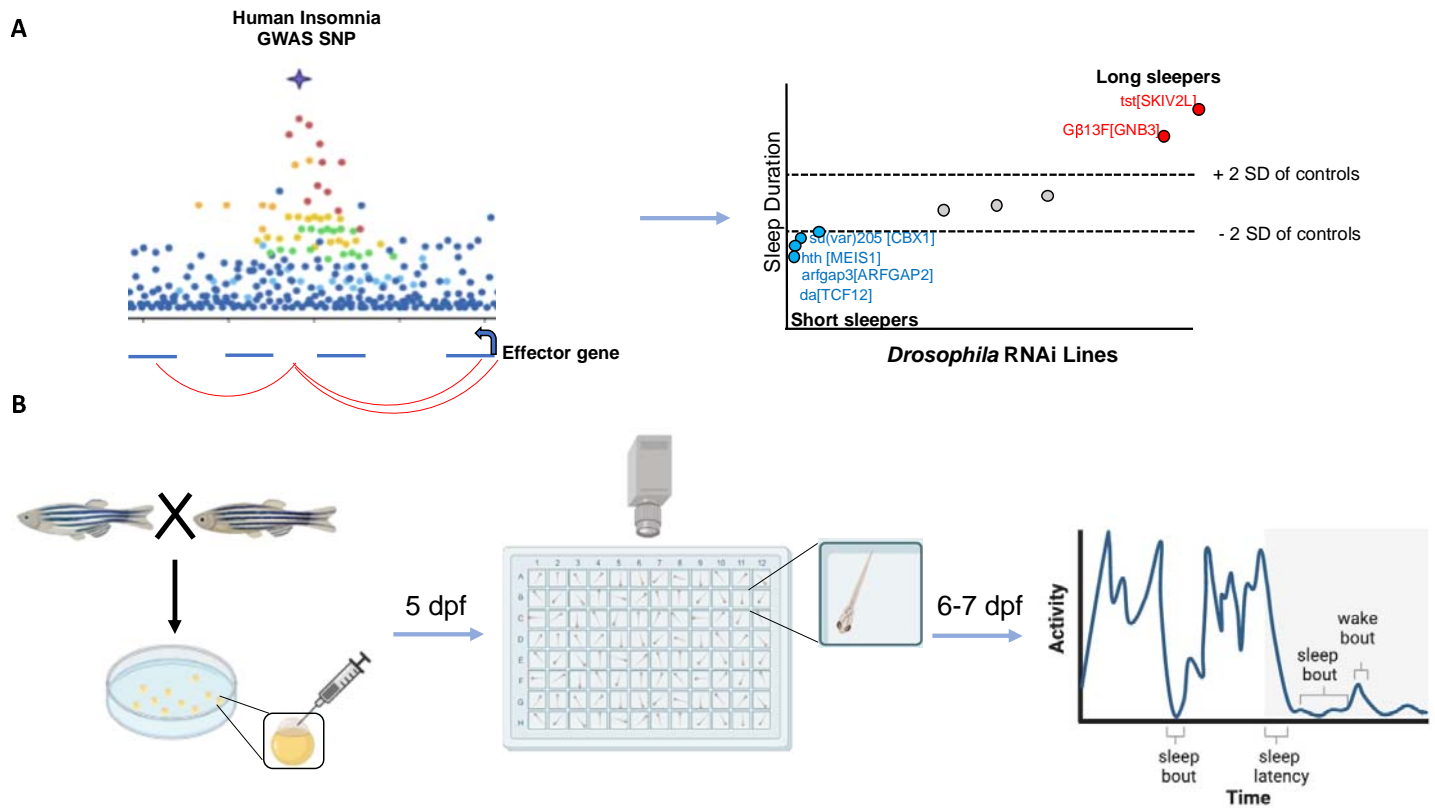

**Fig. 1. Identification of insomnia candidate genes from GWAS signals.** **A.** To identify putative causal genes, insomnia GWAS variants were mapped to target effector gene in neural progenitor cells using 3D genomics, then candidate effector genes were screened using *Drosophila* RNA interference to identify those producing significant sleep phenotypes (adapted from Palermo et. al.). **B.** Single cell embryos were injected with preformed CRISPR-Cas9 complexes to create mutations in candidate effector genes. F0 larvae were tested for sleep characteristics beginning on 5 days post fertilization (dpf) and phenotyped for sleep-wake behaviors from day 6-7 using automated video tracking. Figure created in BioRender.



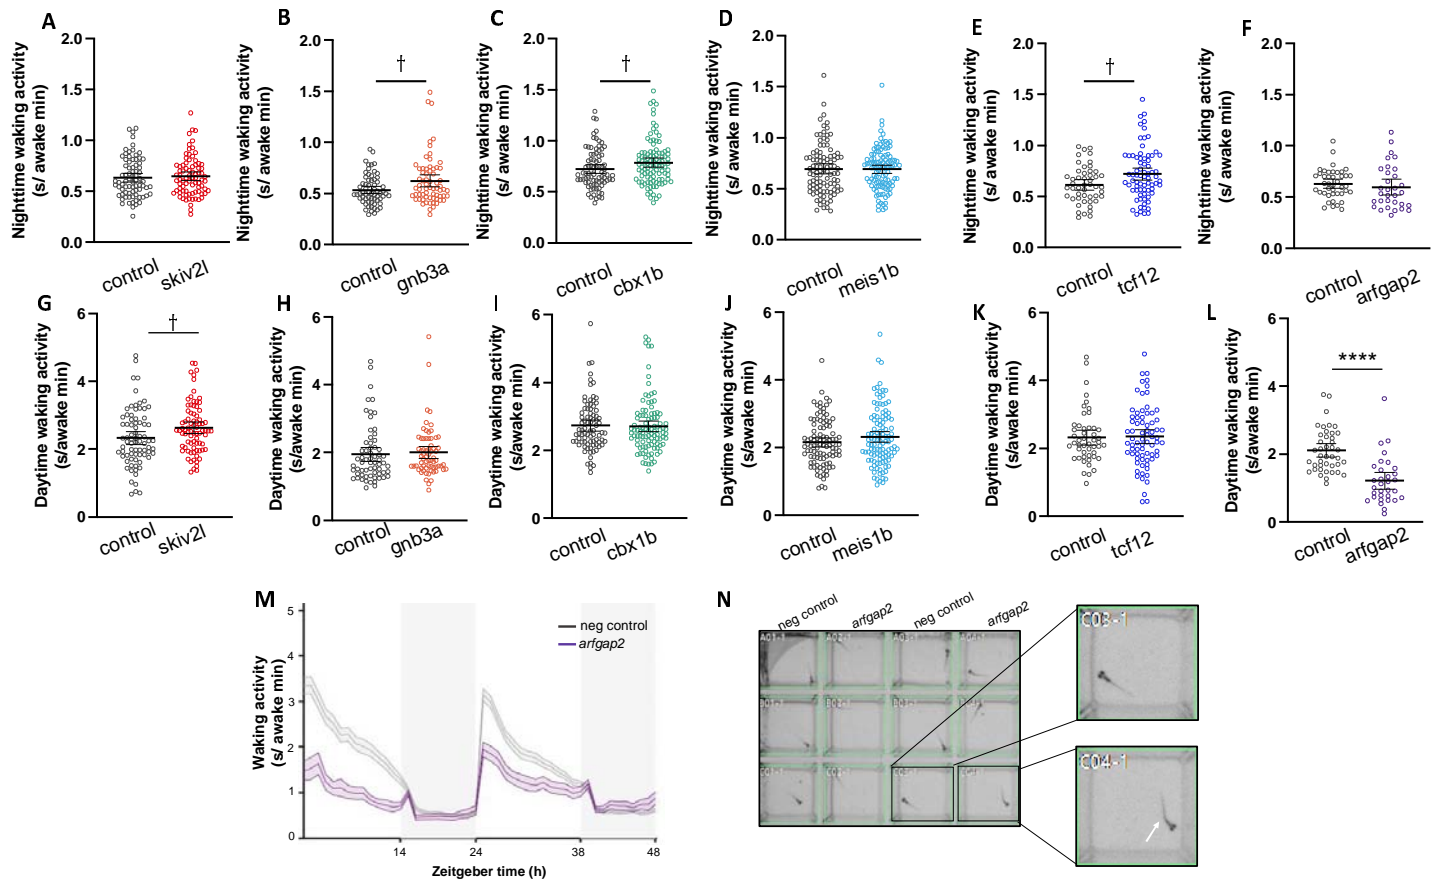

**Fig. 2. Waking activity and development is disrupted by mutation of *arfgap2*.** A-F. Nighttime waking activity displayed as mean  $\pm$  95% CI for all mutants. G-L. Daytime waking activity displayed as mean  $\pm$  95% CI for all mutants. M. Waking activity graph for *arfgap2* mutants displayed as mean (line) and SEM (shaded). Gray shaded regions represent lights-off period. N. Representative image of *arfgap2* mutants and controls. Notable tail curvature (white arrow) is apparent in nearly all *arfgap2* mutants. \*\*\*\* $p < 0.0001$  determined by Wilcoxon rank sum test and Hochberg step-up procedure for multiple comparisons (see **Methods**). † indicates significant ( $p < 0.05$ ) before multiple comparisons. (n = 77 neg. control, 80 *skiv2l*); (n = 64 neg. control, 67 *gnb3a*); (n = 83 neg. control, 102 *cbx1b*); (n = 100 control, 111 *meis1b*); (n = 49 neg. control, 73 *tcf12*); (n = 42 control, 32 *arfgap2*).

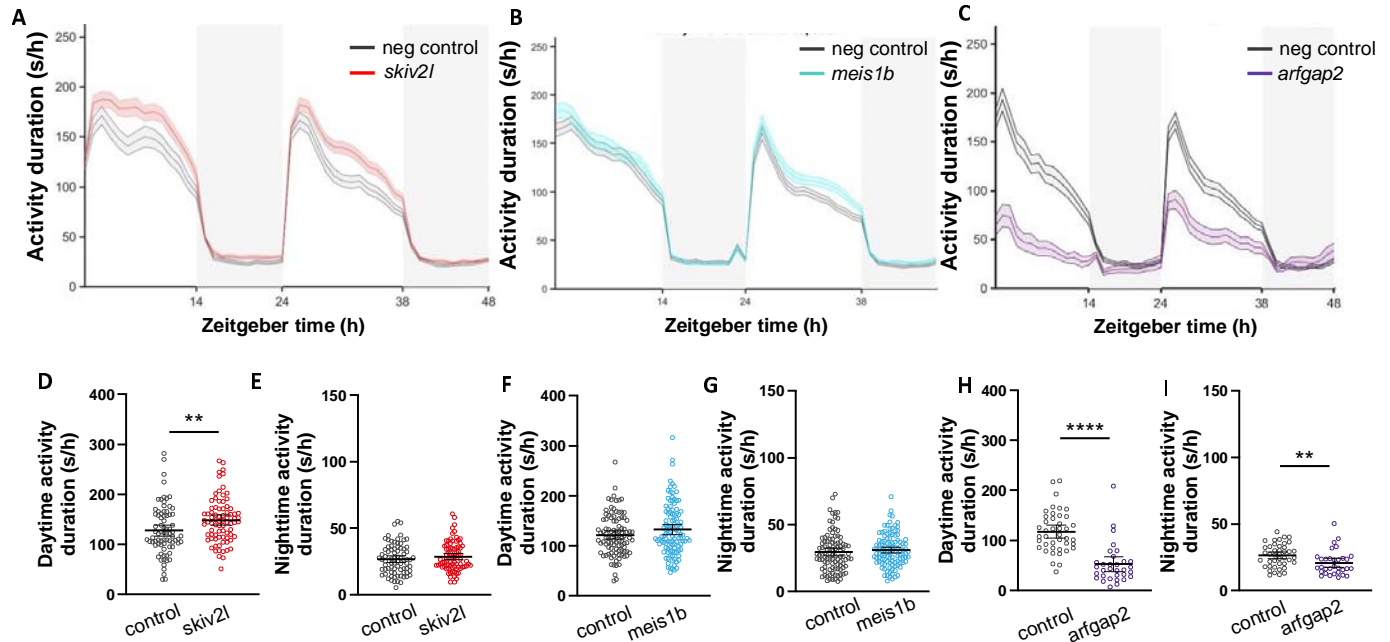

**Fig. 3. Activity duration is altered by *skiv2l* and *arfgap2* mutations.** A-C. Rest-activity graphs for CRISPR mutants represented as mean (line)  $\pm$  SEM (shaded) for activity duration (s/h). Shaded regions represent lights-off period. D-E. Mean  $\pm$  95% CI for day (D) and night (E) activity duration in *skiv2l* mutants (n = 77 neg control, 80 *skiv2l*). F-G. Mean  $\pm$  95% CI for day (F) and night (G) activity duration in *meis1b* mutants (n = 100 control, 111 *meis1b*). H-I. Mean  $\pm$  95% CI for day (H) and night (I) activity duration in *arfgap2* mutants (n = 42 control, 32 *arfgap2*). Significance determined by Wilcoxon rank sum test followed by Hochberg step-up procedure for multiple comparisons (see **Methods**). \* $p < 0.05$ , \*\* $p < 0.01$ , \*\*\* $p < 0.001$ , \*\*\*\* $p < 0.0001$ .

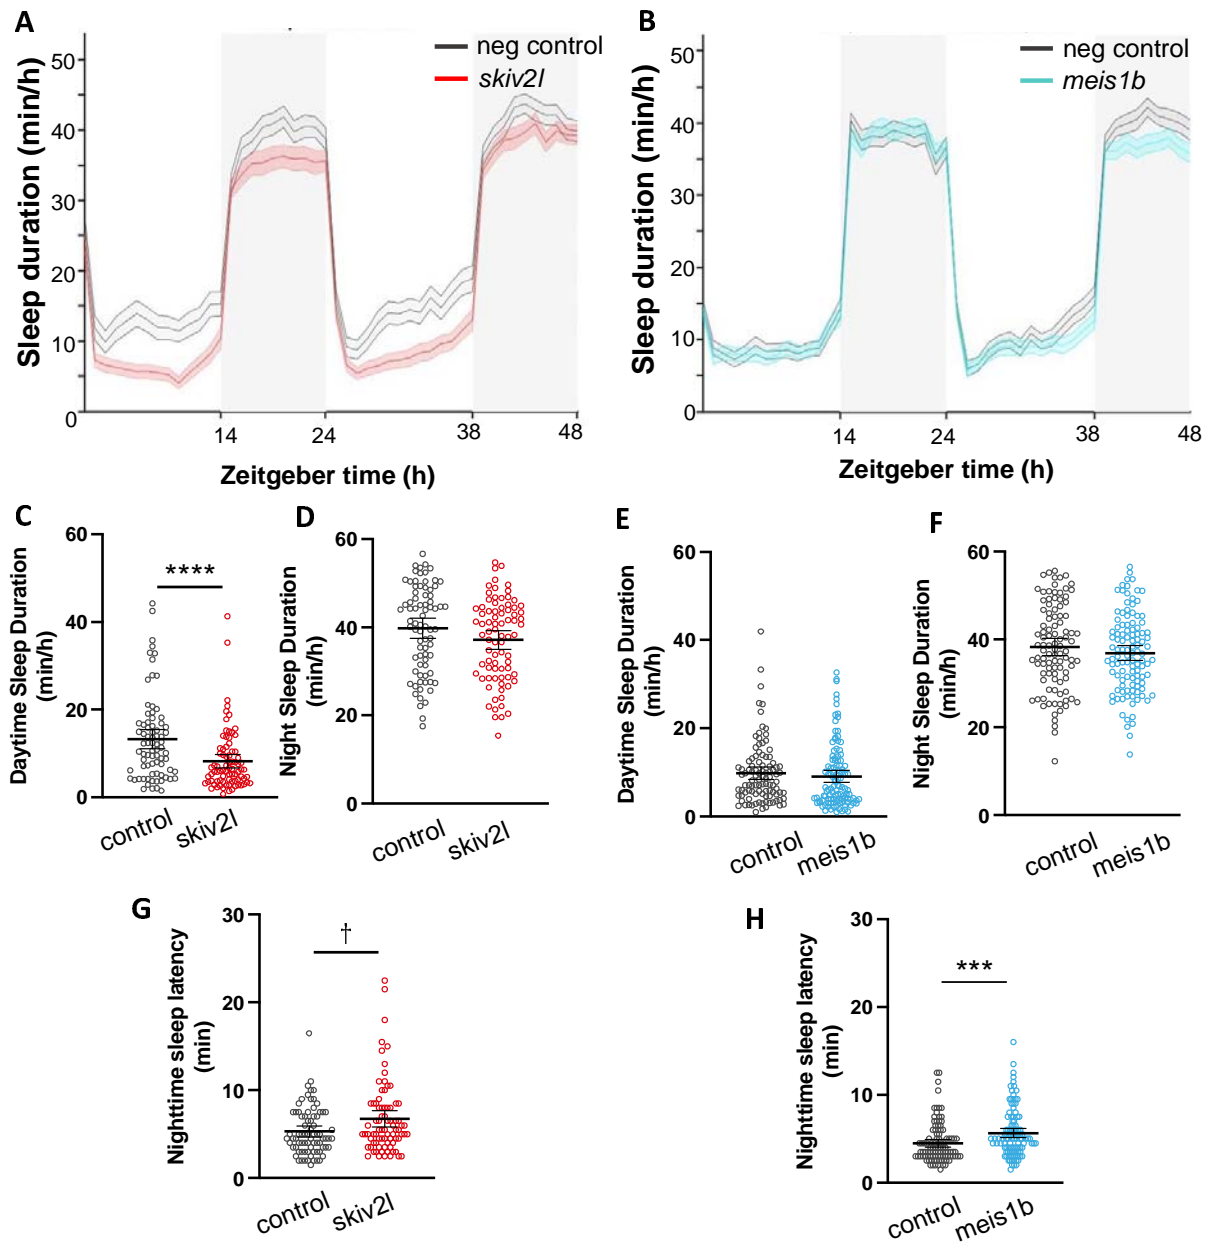

**Fig. 4. Total sleep duration in *skiv2l* and *meis1b* CRISPR mutants.** Rest-activity graphs for *skiv2l* (A) and *meis1b* (B) mutants represented as mean (line)  $\pm$  SEM (shaded) for sleep duration (min/h). Shaded regions represent lights-off period. Mean  $\pm$  95% CI for day (C) and night (D) sleep duration in *skiv2l* mutants (n = 77 neg. control, 80 *skiv2l*). Mean  $\pm$  95% CI for day (E) and night (F) sleep duration in *meis1b* mutants (n = 100 neg. control, 111 *meis1b*). Mean  $\pm$  95% CI for nighttime sleep latency in *skiv2l* (G) and *meis1b* (H) mutants. Significance determined by Wilcoxon rank sum test followed by Hochberg step-up procedure for multiple comparisons (see **Methods**). \* $p < 0.05$ , \*\* $p < 0.01$ , \*\*\* $p < 0.001$ , \*\*\*\* $p < 0.0001$ . † indicates significant ( $p < 0.05$ ) before multiple comparisons.

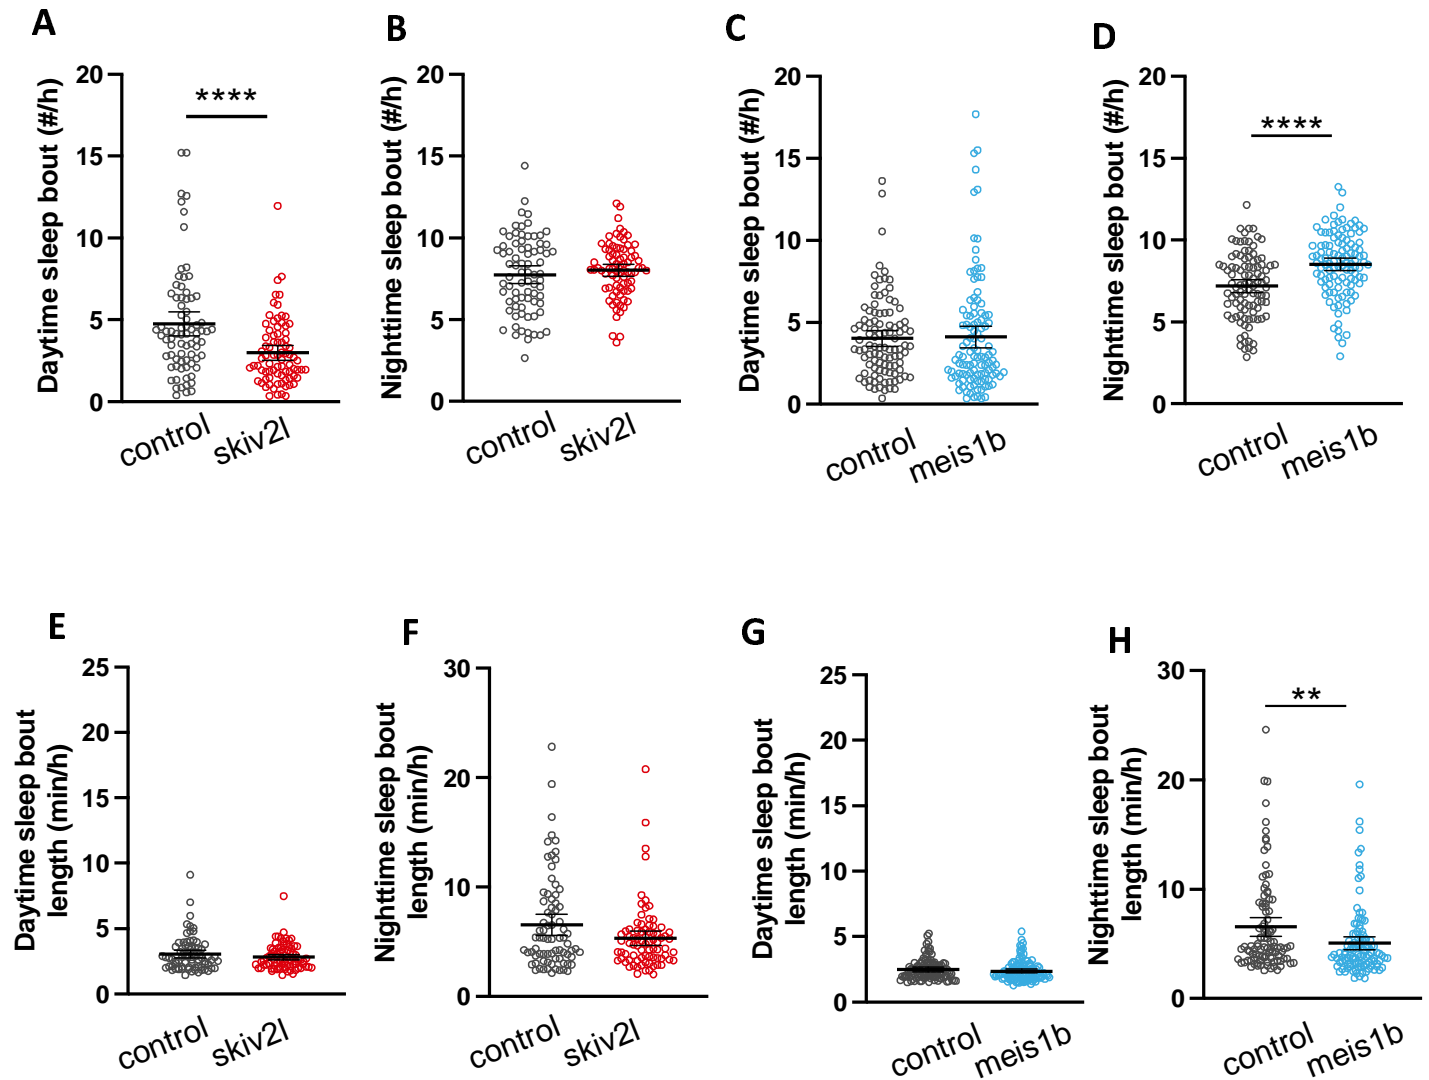

**Fig. 5. Sleep characteristics are significantly altered by CRISPR mutation of *skiv2l* and *meis1b*.** Mean  $\pm$  95% CI for day and night sleep bout number in *skiv2l* (A-B) and *meis1b* (C-D) mutants. Mean  $\pm$  95% CI for day and night sleep bout length for *skiv2l* (E-F) and *meis1b* (G-H) mutants. Significance determined by Wilcoxon rank sum test followed by Hochberg step-up procedure for multiple comparisons (see **Methods**). \* $p < 0.05$ , \*\* $p < 0.01$ , \*\*\* $p < 0.001$ , \*\*\*\* $p < 0.0001$ . (n = 77 neg. control, 80 *skiv2l*); (n = 100 control, 111 *meis1b*).
